# Supplementary material for: Removal of CD276+ cells from haploidentical memory T-cell grafts significantly lowers the risk of GVHD
Source: PubMed Central journal article supplement (PMC8486669; doi:10.1038/s41409-021-01307-9), 2021-05-11
Supplement: 41409_2021_1307_MOESM1_ESM.pdf [file 41409_2021_1307_MOESM1_ESM.pdf]

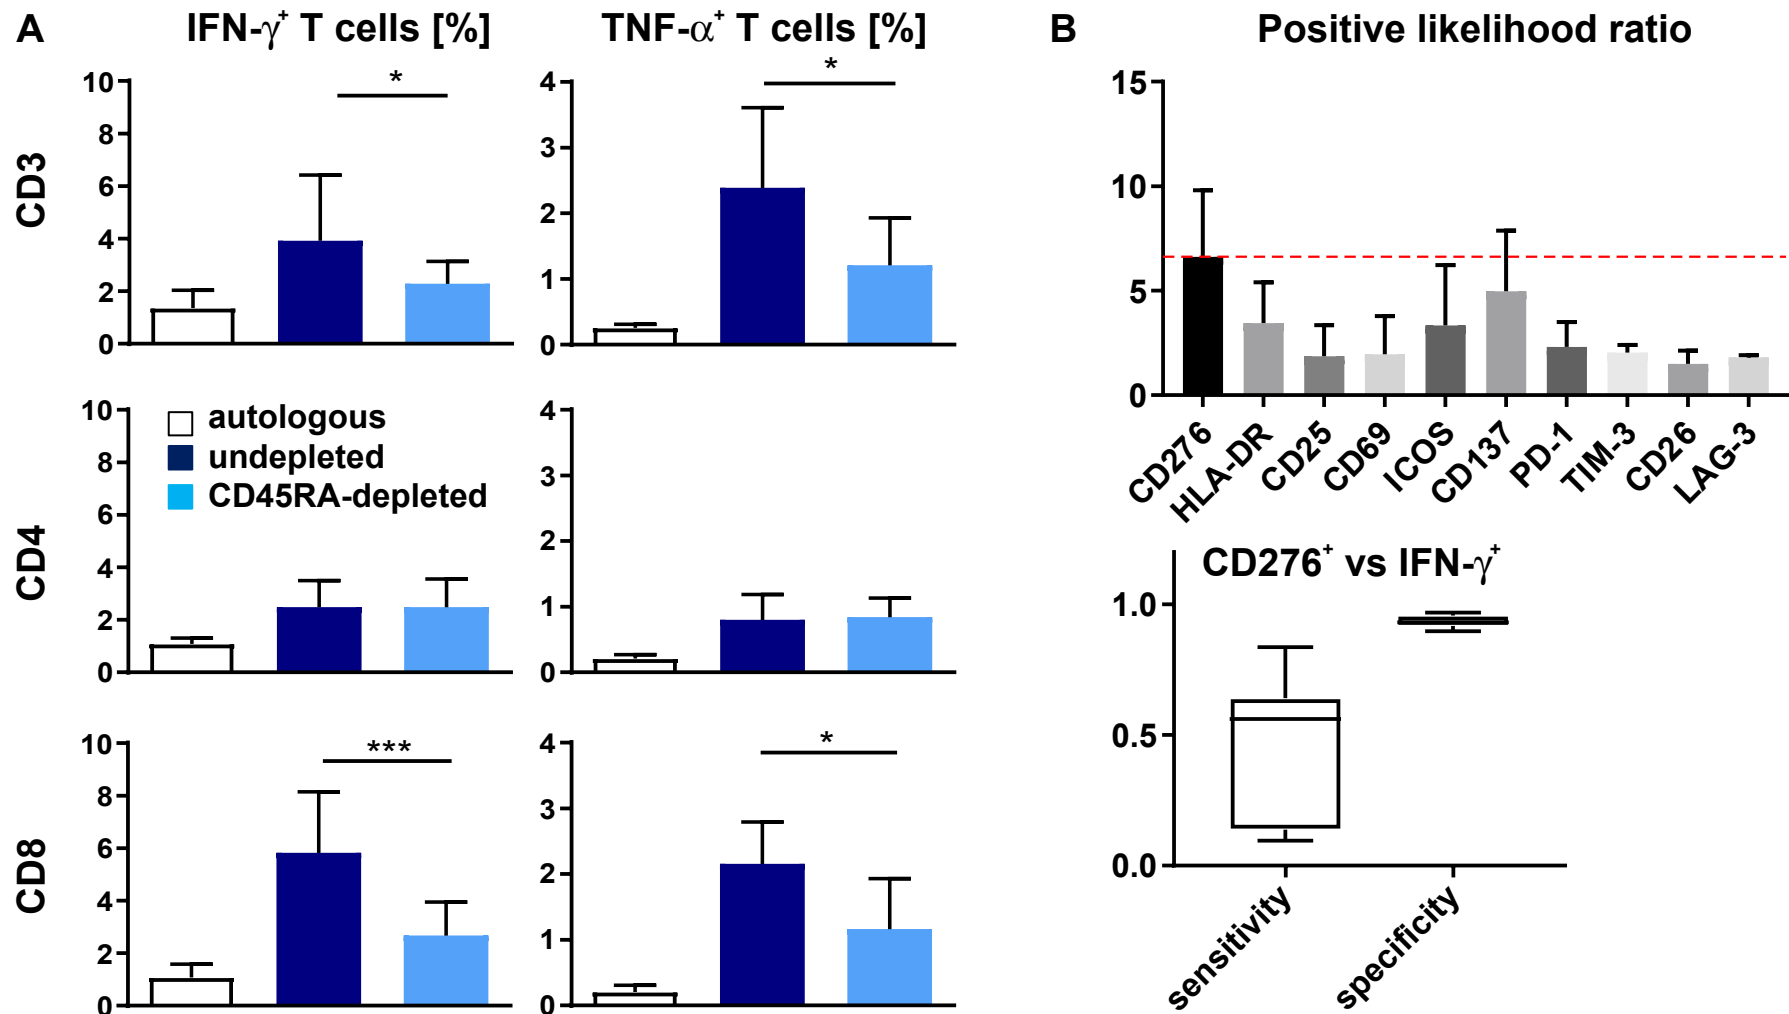

**Supplementary Figure 1: CD45RA-depletion attenuates alloreactivity in CD8+ but not in CD4+ T cells.** CD45RA-depleted and whole PBMCs were stimulated at a 1:1 ratio with haploidentical irradiated PBMCs and tested for cytokine secretion at day 7. (A) IFN- $\gamma$  and TNF- $\alpha$  CD4<sup>+</sup> and CD8<sup>+</sup> T cells among CD3<sup>+</sup> (n=4). (B) Positive likelihood detection of IFN- $\gamma$  CD4<sup>+</sup> alloreactive T cells calculated by (sensitivity) / (1- specificity) (n=4). Sensitivity and specificity of CD276<sup>+</sup> T cells in relation to IFN- $\gamma$  alloreactive T cells (n=4). Sensitivity for molecule X= X+IFN- $\gamma$  (%) / (X+ IFN- $\gamma$  (%) + X- IFN- $\gamma$  (%)), Specificity= X- IFN- $\gamma$  (%) / (X- IFN- $\gamma$  (%) + X+ IFN- $\gamma$  (%)), Positive Likelihood Ratio=Sensitivity/(1-Specificity). \*P < 0.05, \*\*\*P < 0.001 by one-way ANOVA followed by Tukey's multiple comparison test.

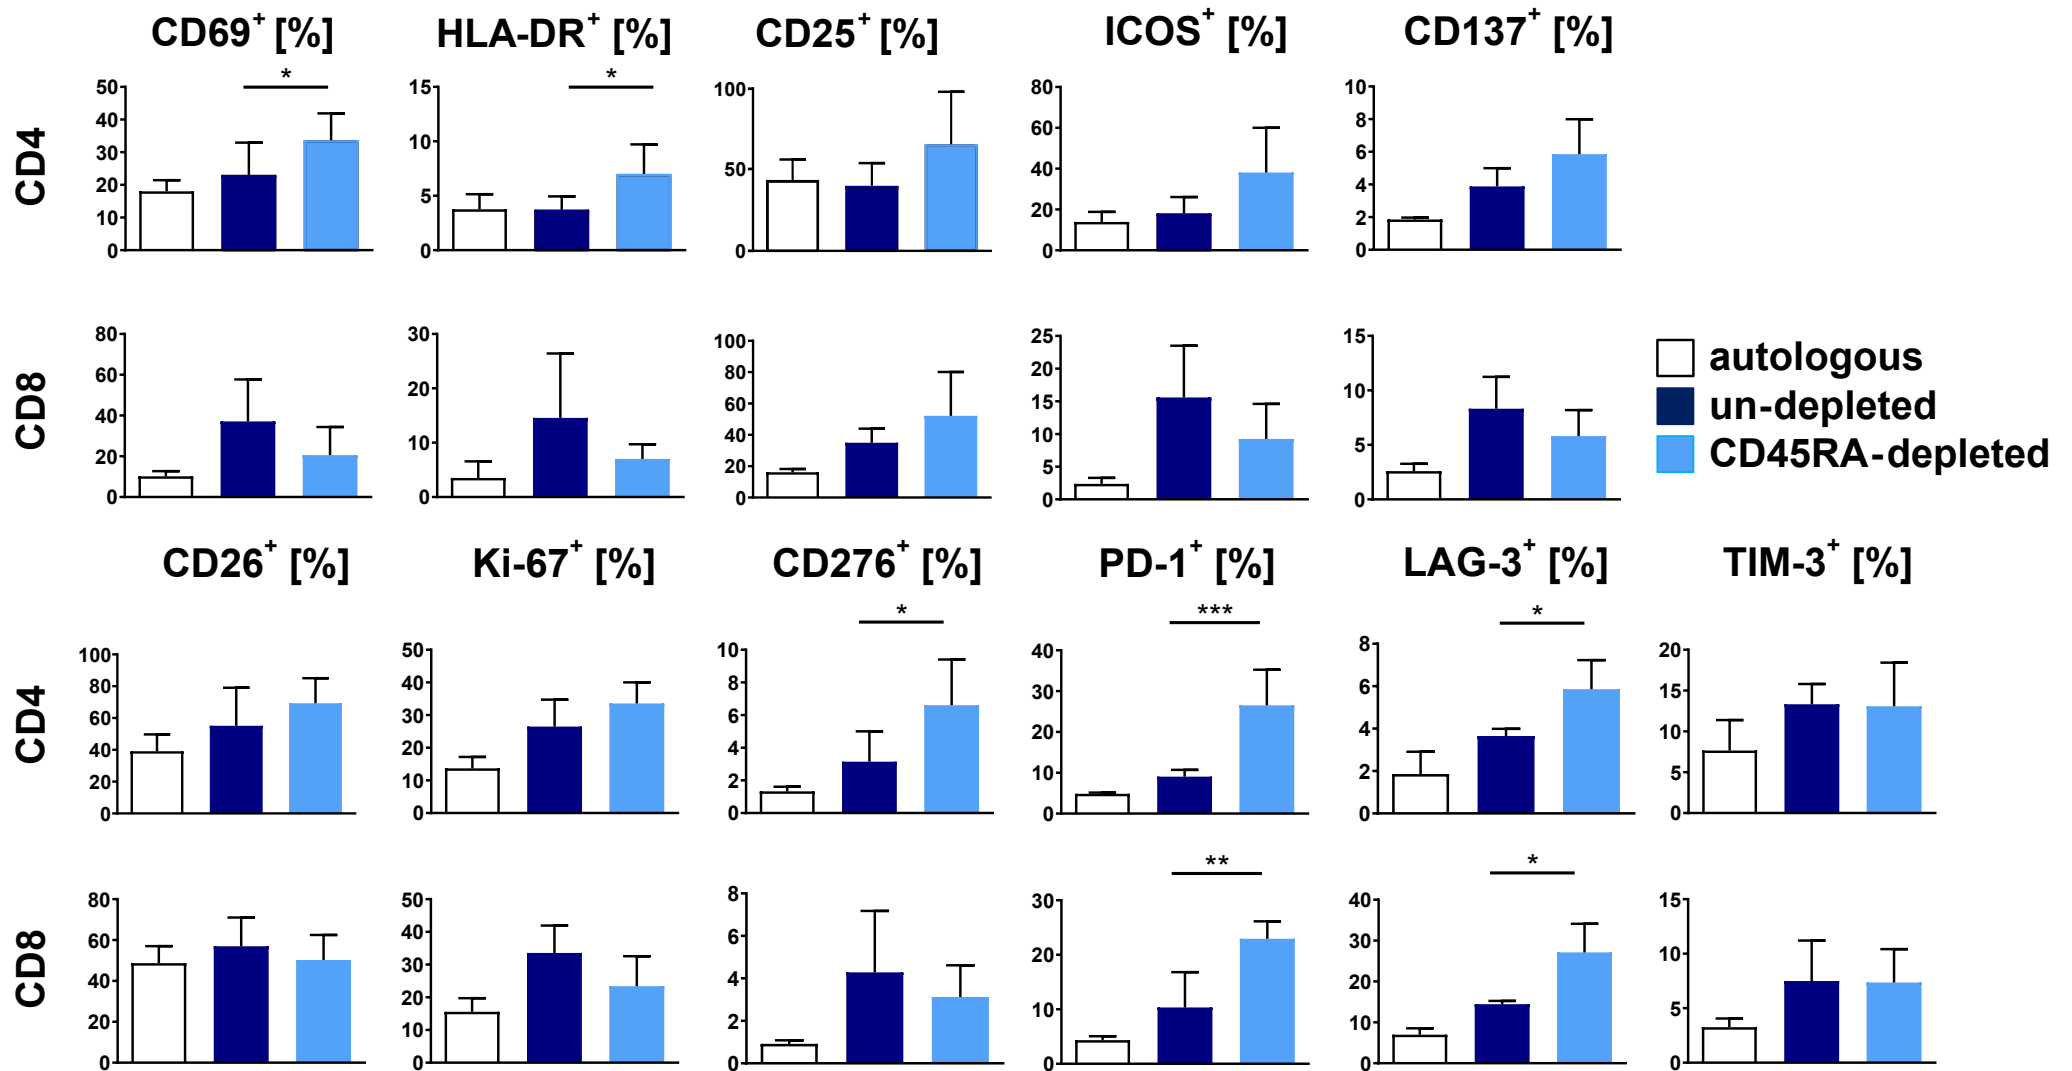

**Supplementary Figure 2:** CD45RA-depletion attenuates alloreactivity in CD8<sup>+</sup> but not CD4<sup>+</sup> T cells. CD45RA-depleted and whole PBMCs were stimulated at a 1:1 ratio with haploidentical, irradiated PBMCs and tested for activation/proliferation markers and co-receptor expression at day7 (n=4). \*P < 0.05, \*\*P < 0.01, \*\*\*P < 0.001 by one-way ANOVA followed by Tukey's multiple comparison test.

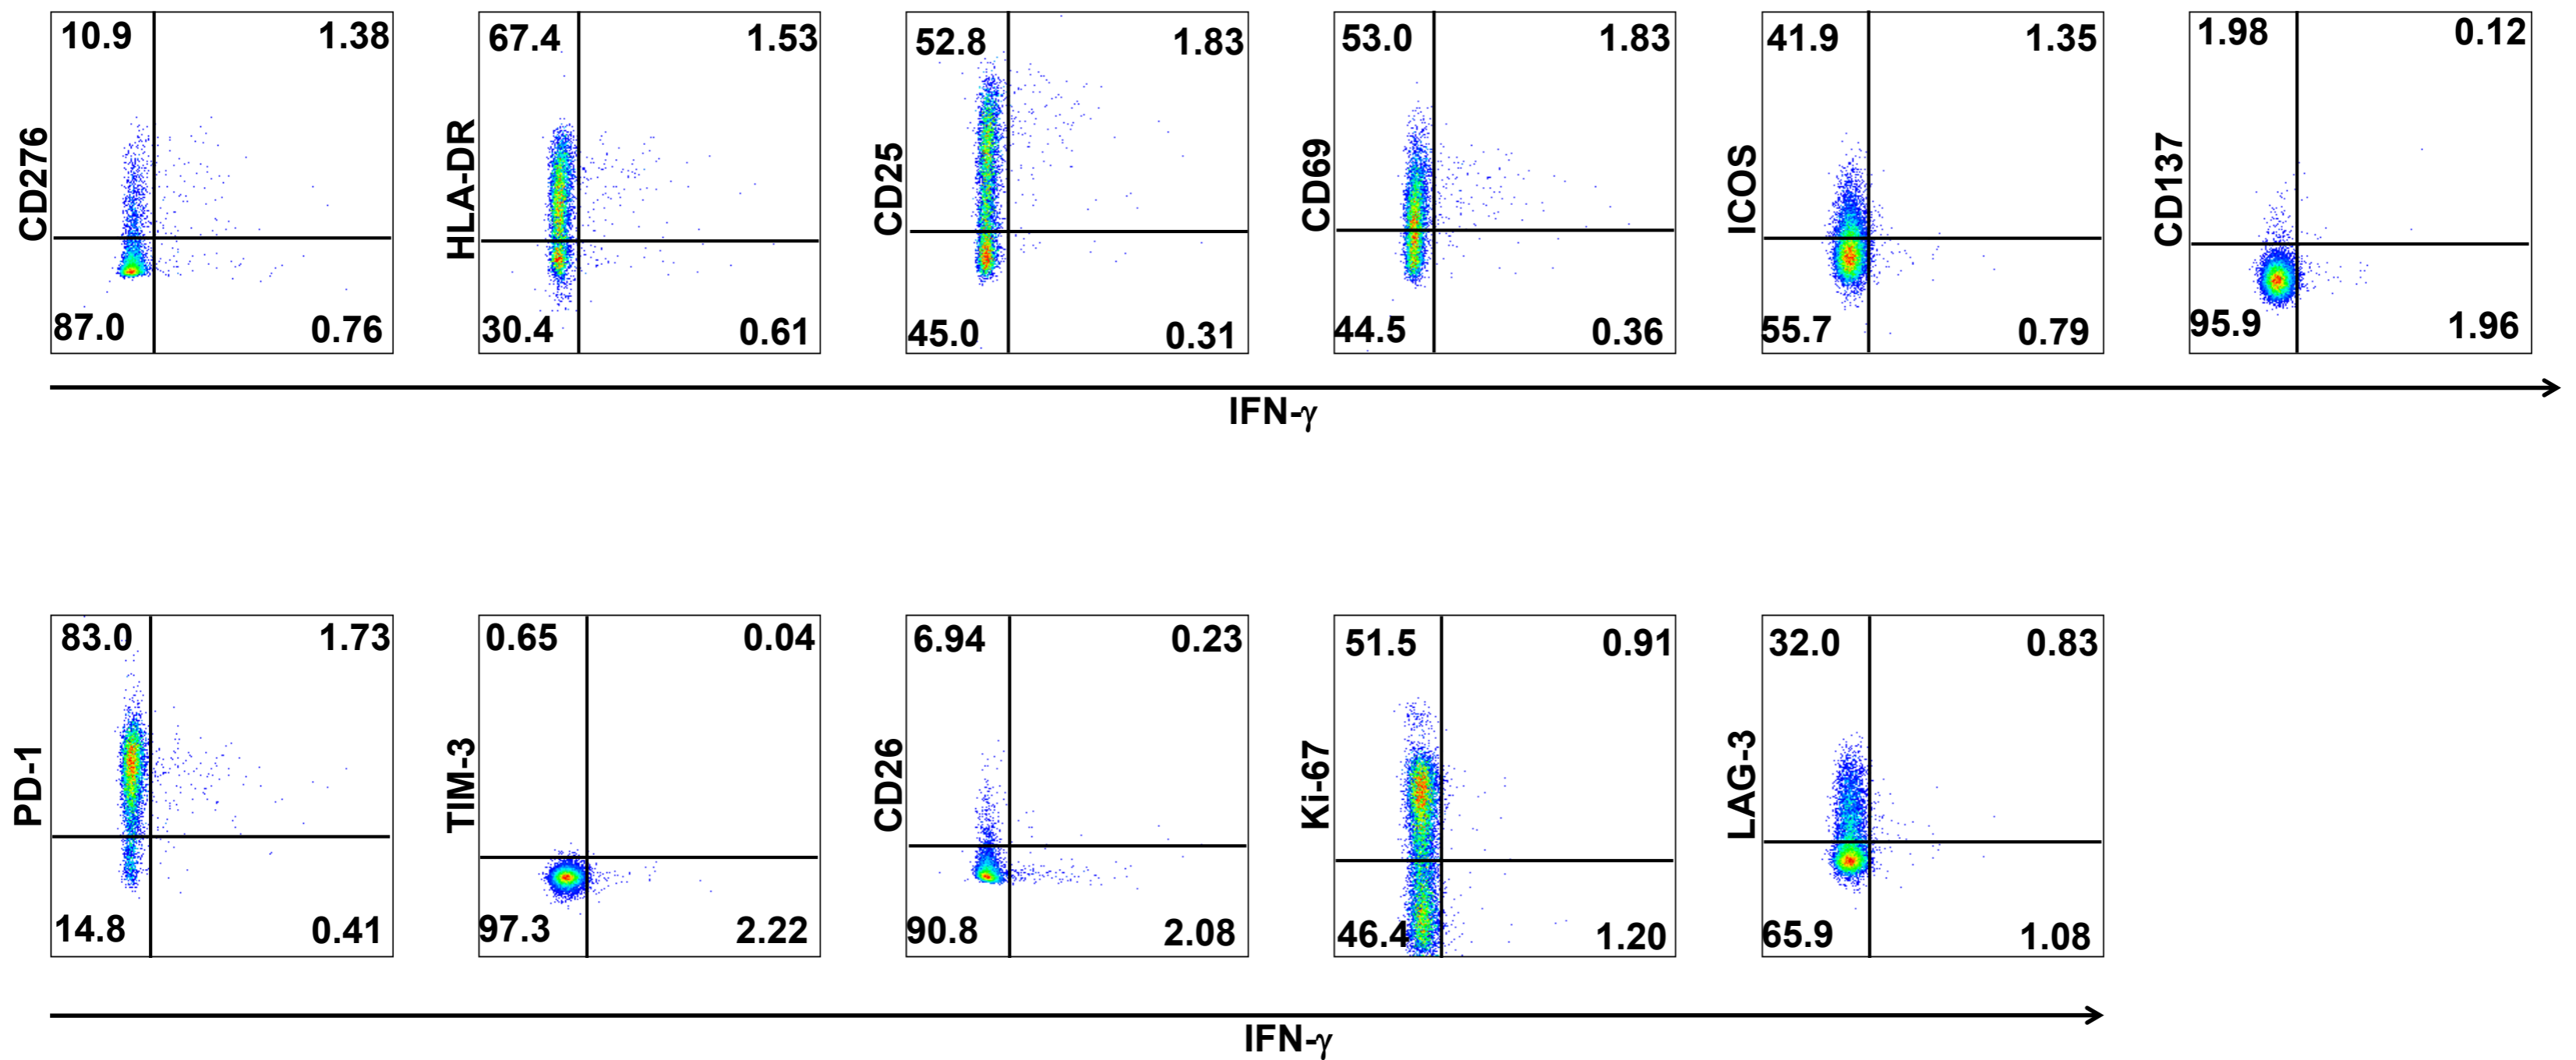

**Supplementary Figure 3: Correlation of activation/ proliferation markers and co-receptors with IFN- $\gamma$ .**

CD45RA-depleted PBMCs were stimulated at a 1:1 ratio with haploidentical irradiated PBMCs and tested for activation/ proliferation markers and co-receptors expression at day 7. The representative scatter plots for CD276 and IFN, and for the other markers evaluated and IFN among CD4<sup>+</sup> T cells are shown. The values in scatter plots indicate the percentage of the cells in each quadrant region.

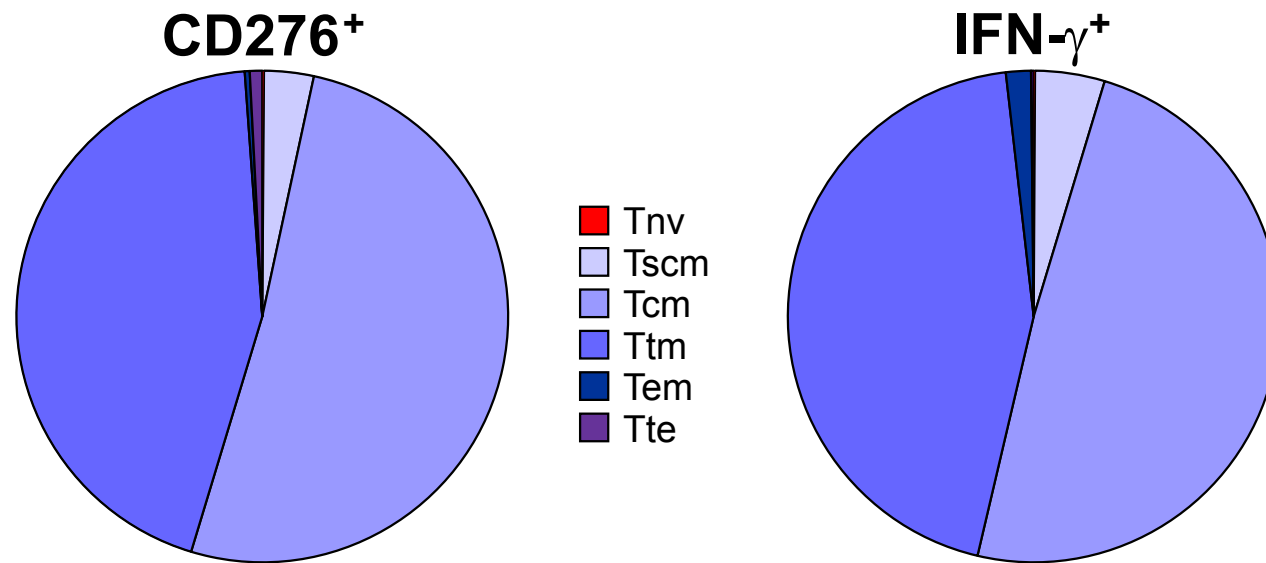

**Supplementary Figure 4:** Memory phenotype of CD276<sup>+</sup>CD4<sup>+</sup> T cells is almost identical with that of IFN- $\gamma$ <sup>+</sup>CD4<sup>+</sup> T cells. CD45RA-depleted PBMCs were stimulated at a 1:1 ratio with haploidentical, irradiated PBMCs and immunological memory phenotype of CD276<sup>+</sup>CD4<sup>+</sup> T cells and of IFN- $\gamma$ <sup>+</sup>CD4<sup>+</sup> T cells was analyzed at day7. Data from one representative donor out of four are shown.

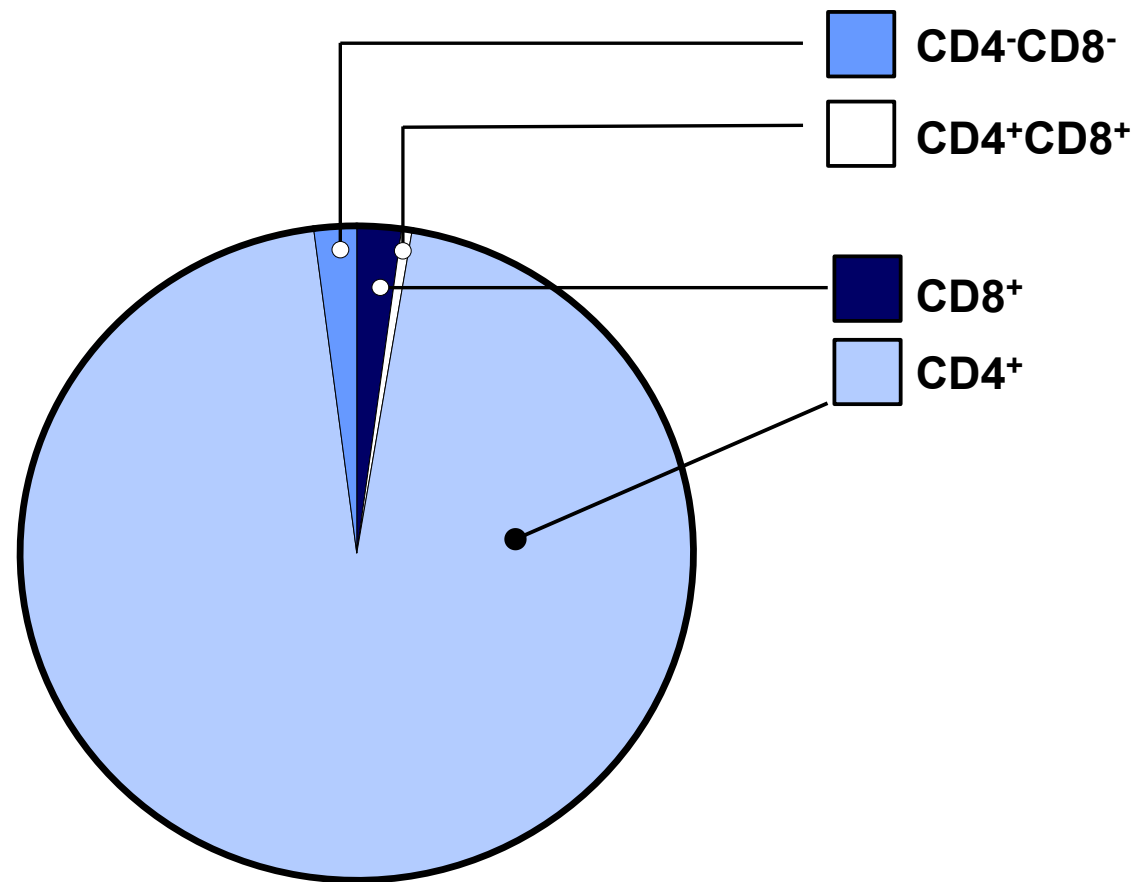

**Supplementary Figure 5:** Magnetically isolated CD276<sup>+</sup> T cells from the graft after haplo-MLC, are mostly CD4<sup>+</sup>. CD45RA-depleted PBMCs were stimulated at a 1:1 ratio with haploidentical irradiated PBMCs and CD276<sup>+</sup> T cells were analyzed for CD4/CD8 positivity at day7 (n=5). Mean values are shown.

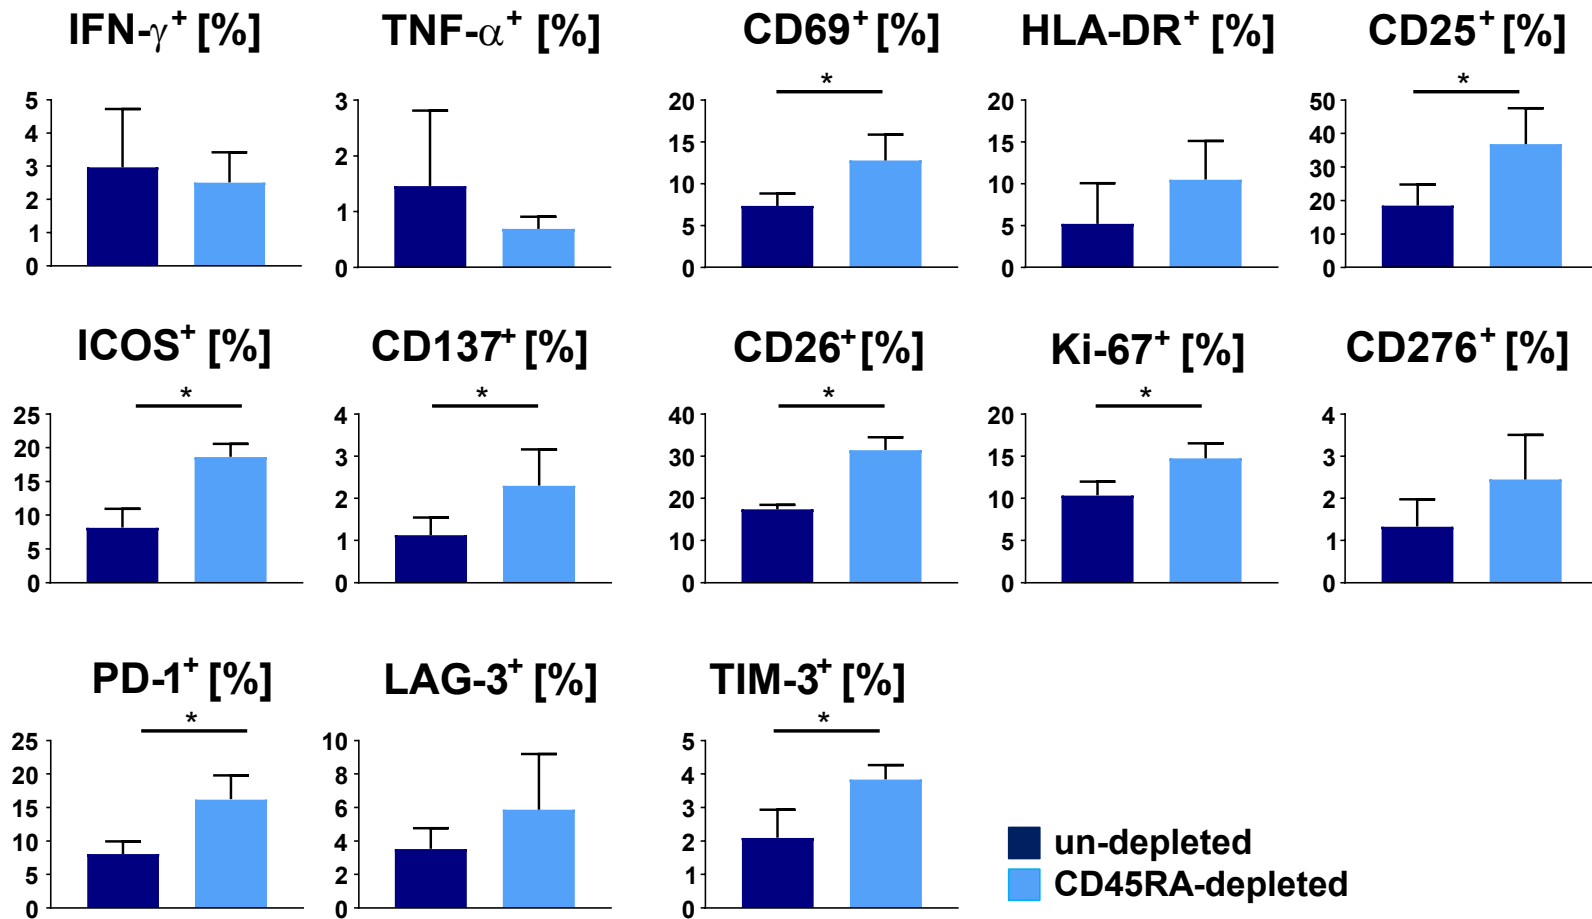

**Supplementary Figure 6:** CD45RA-depletion does not reduce IFN- $\gamma$ /TNF- $\alpha$  secretion, but rather up-regulates activation markers such as CD69 and CD25, Ki-67, and co-stimulatory/co-inhibitory molecules such as ICOS, CD137, CD26, CD276, and PD-1 in MLC between DR4<sup>negative</sup> human CD4<sup>+</sup> T cells and DR4<sup>+</sup> mouse PBMCs. DR4<sup>negative</sup> human bulk or memory CD4<sup>+</sup> T cells were stimulated at a 3:1 ratio with DR4<sup>+</sup> mouse PBMCs in MLC (n=3). \*P < 0.05 by one-way ANOVA followed by Tukey's multiple comparison test.

**MM** Bulk CD4

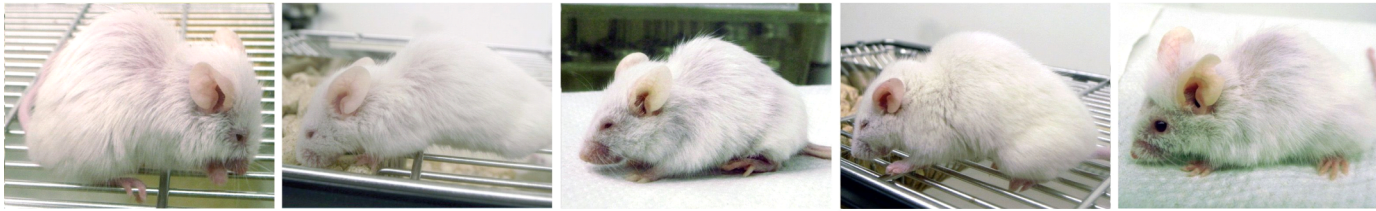

Memory CD4

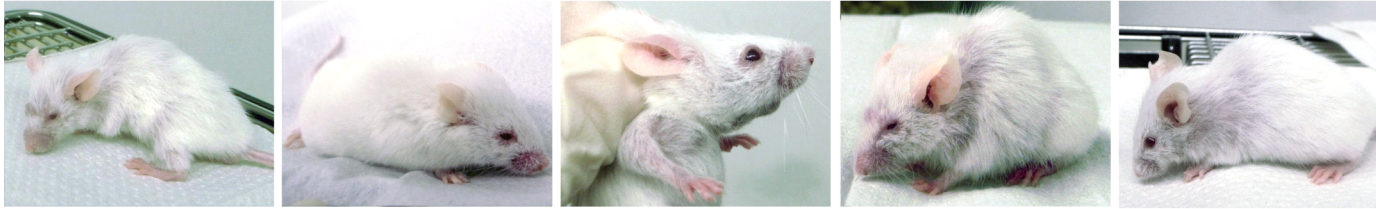

CD276-depl. memory

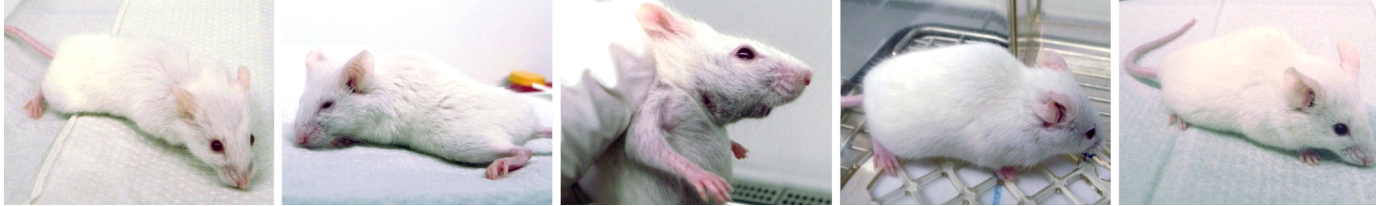

**M** Bulk CD4

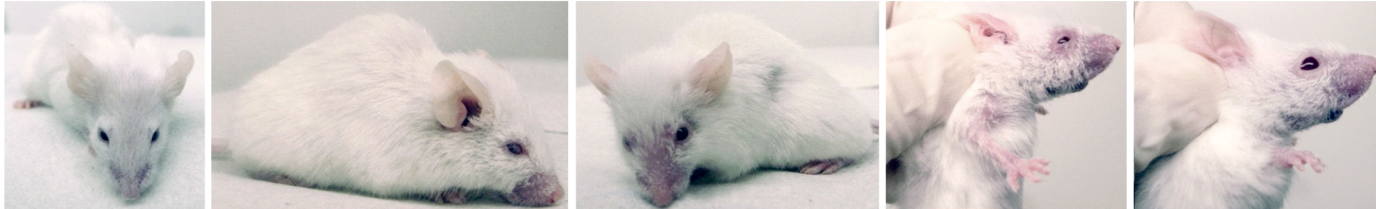

Memory CD4

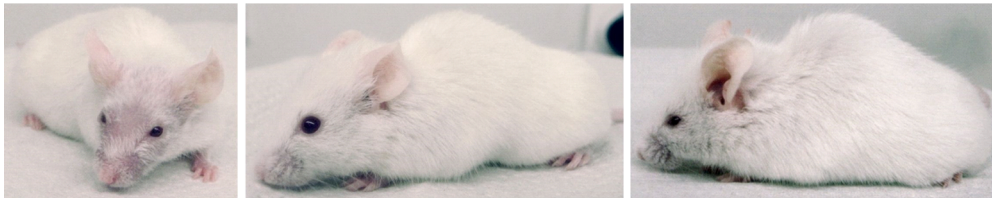

**MM: DR4 mismatched**  
**M: DR4 matched**

CD276-depl. memory

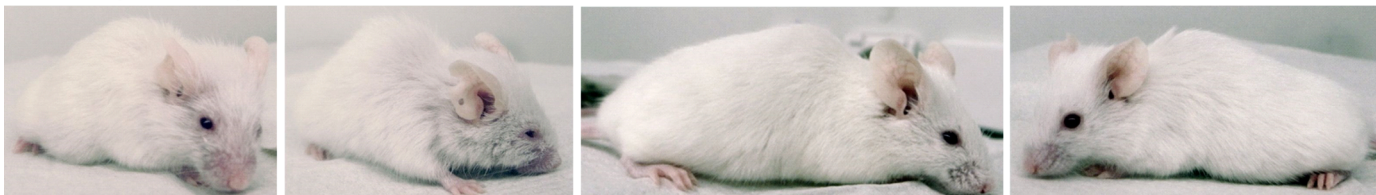

**Supplementary Figure 7:**

In both HLA-DR4-mismatched and matched settings, memory or CD276-depleted memory CD4<sup>+</sup> T cells significantly improves clinical GVHD symptoms. In HLA-DR4-mismatched setting CD45RA/CD276-depletion attenuates GVHD symptoms further compared to sole CD45RA-depletion while no significant difference was observed in the clinical GVHD symptoms of recipients receiving CD45RA-depleted and CD45RA/CD276-depleted grafts in the HLA-DR4-matched setting. Images of different individuals from bulk, memory or CD276-depleted memory cohort respectively in the DR4 mismatched and DR4 matched setting are shown.

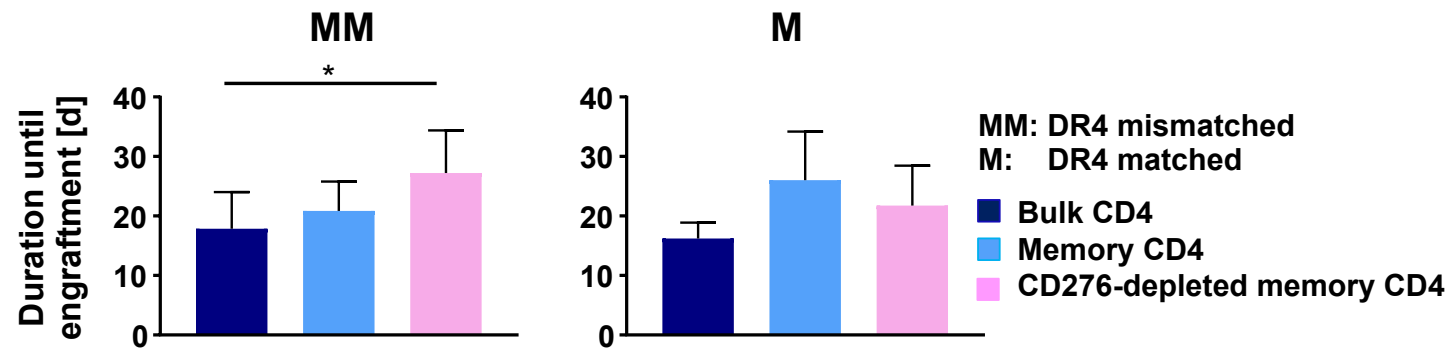

**Supplementary Figure 8:** CD45RA/CD276-depletion extended the time until engraftment compared with non-depleted grafts in HLA-DR4-mismatched settings. Time periods until first detection of >5% human cells in whole PBMCs (days) are shown. \*P < 0.05 by one-way ANOVA followed by Tukey's multiple comparison test.



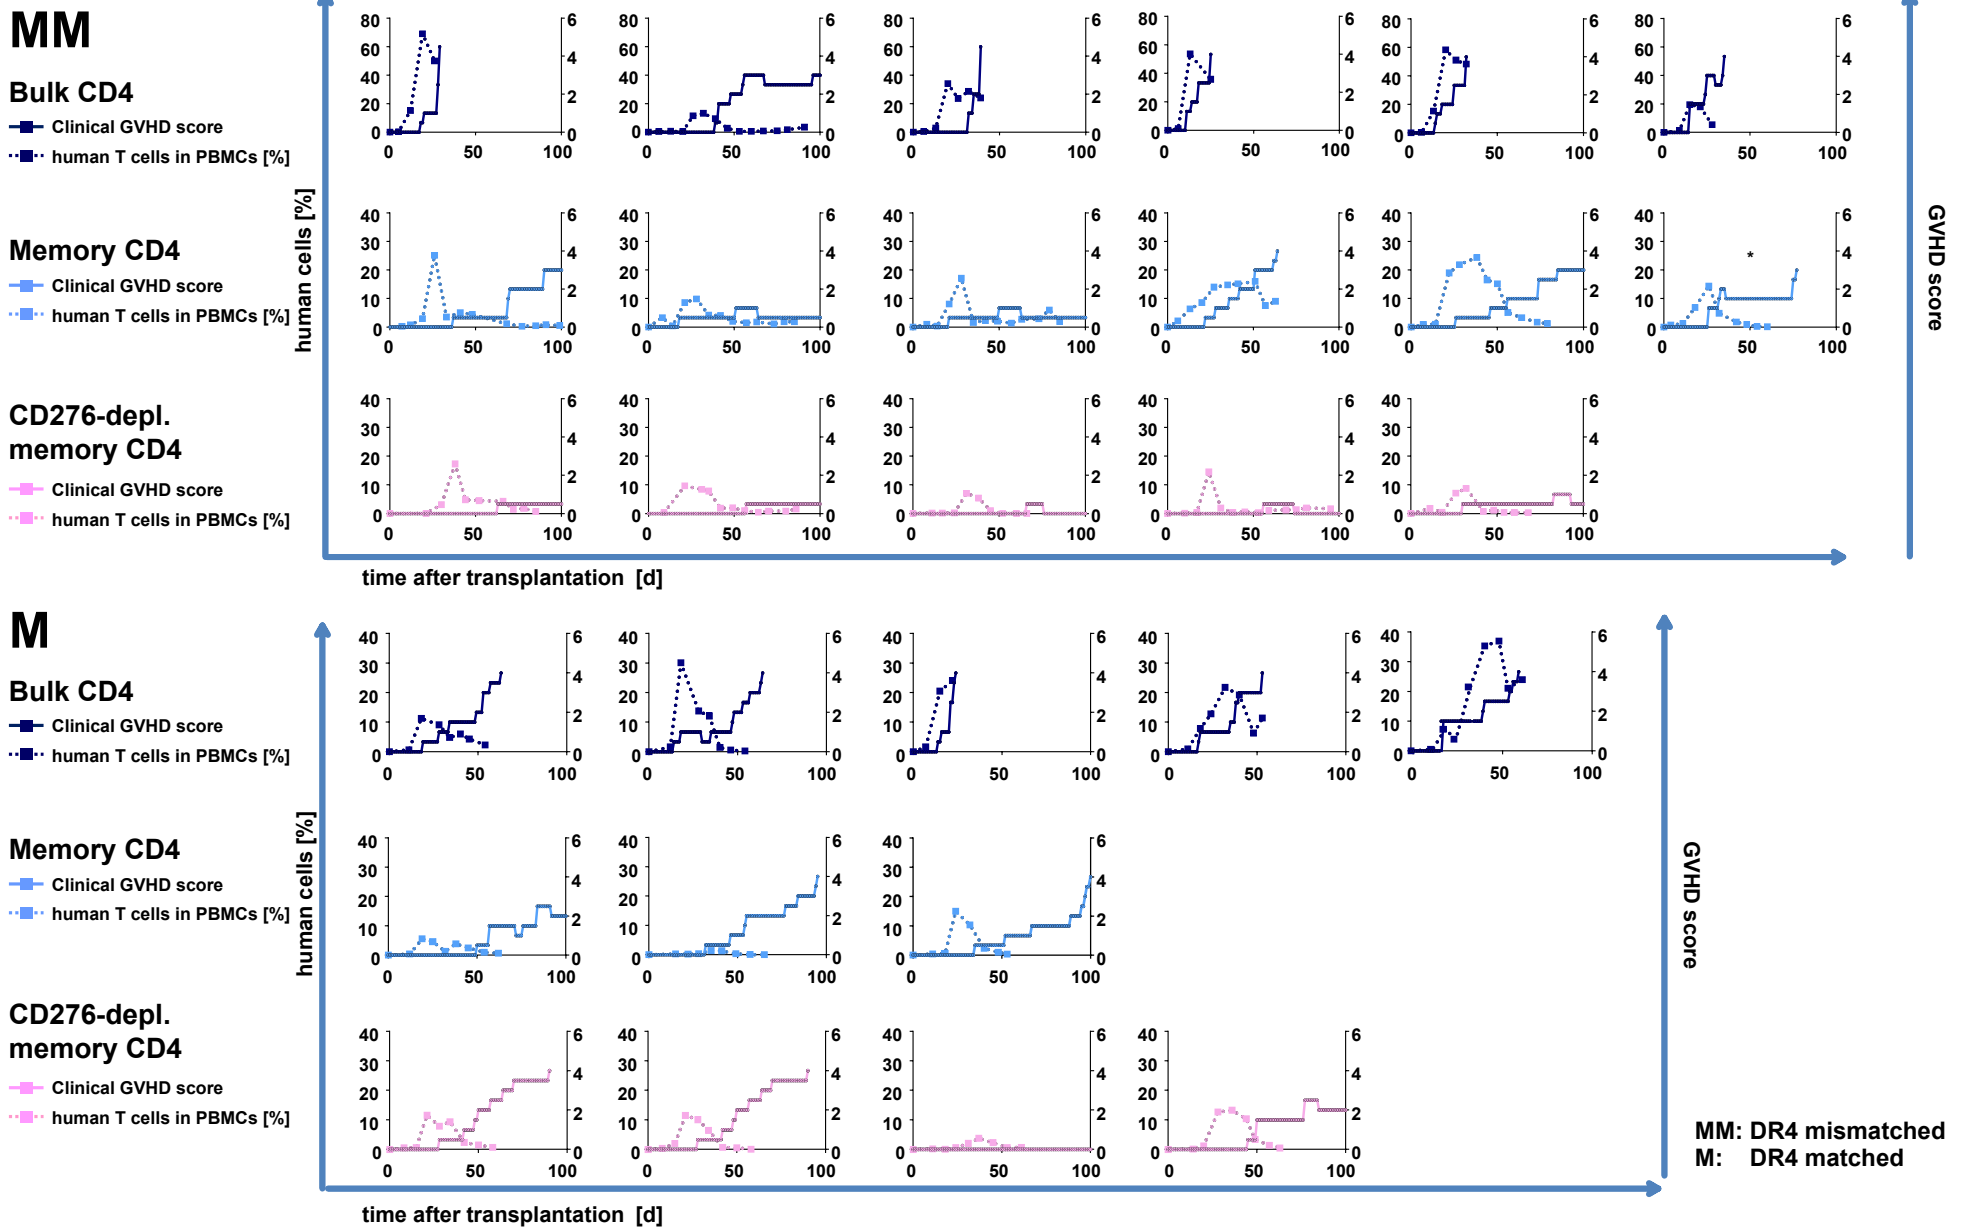

**Supplementary Figure 9:** Chronological change of the frequency of human T cells in the peripheral blood and clinical GVHD score of individual mice. Individual mice were scored daily for the summation of five clinical parameters of GVHD (posture, activity, fur, skin and weight loss). The frequency of human T cells in the mouse peripheral blood was monitored weekly. Mice were sacrificed when reaching a single score of 1.5 or exceeding clinical score of 4 or when reaching endpoint of the study (day100). One mouse in the cohort of memory CD4<sup>+</sup> T-cell transplantation from a DR4<sup>negative</sup> donor (designated by \*) was excluded from analysis due to sacrifice for non-GVHD related complication (uterine prolapse). Left y-axis: % human T cells in mouse PBMCs. Right y-axis: GVHD score.

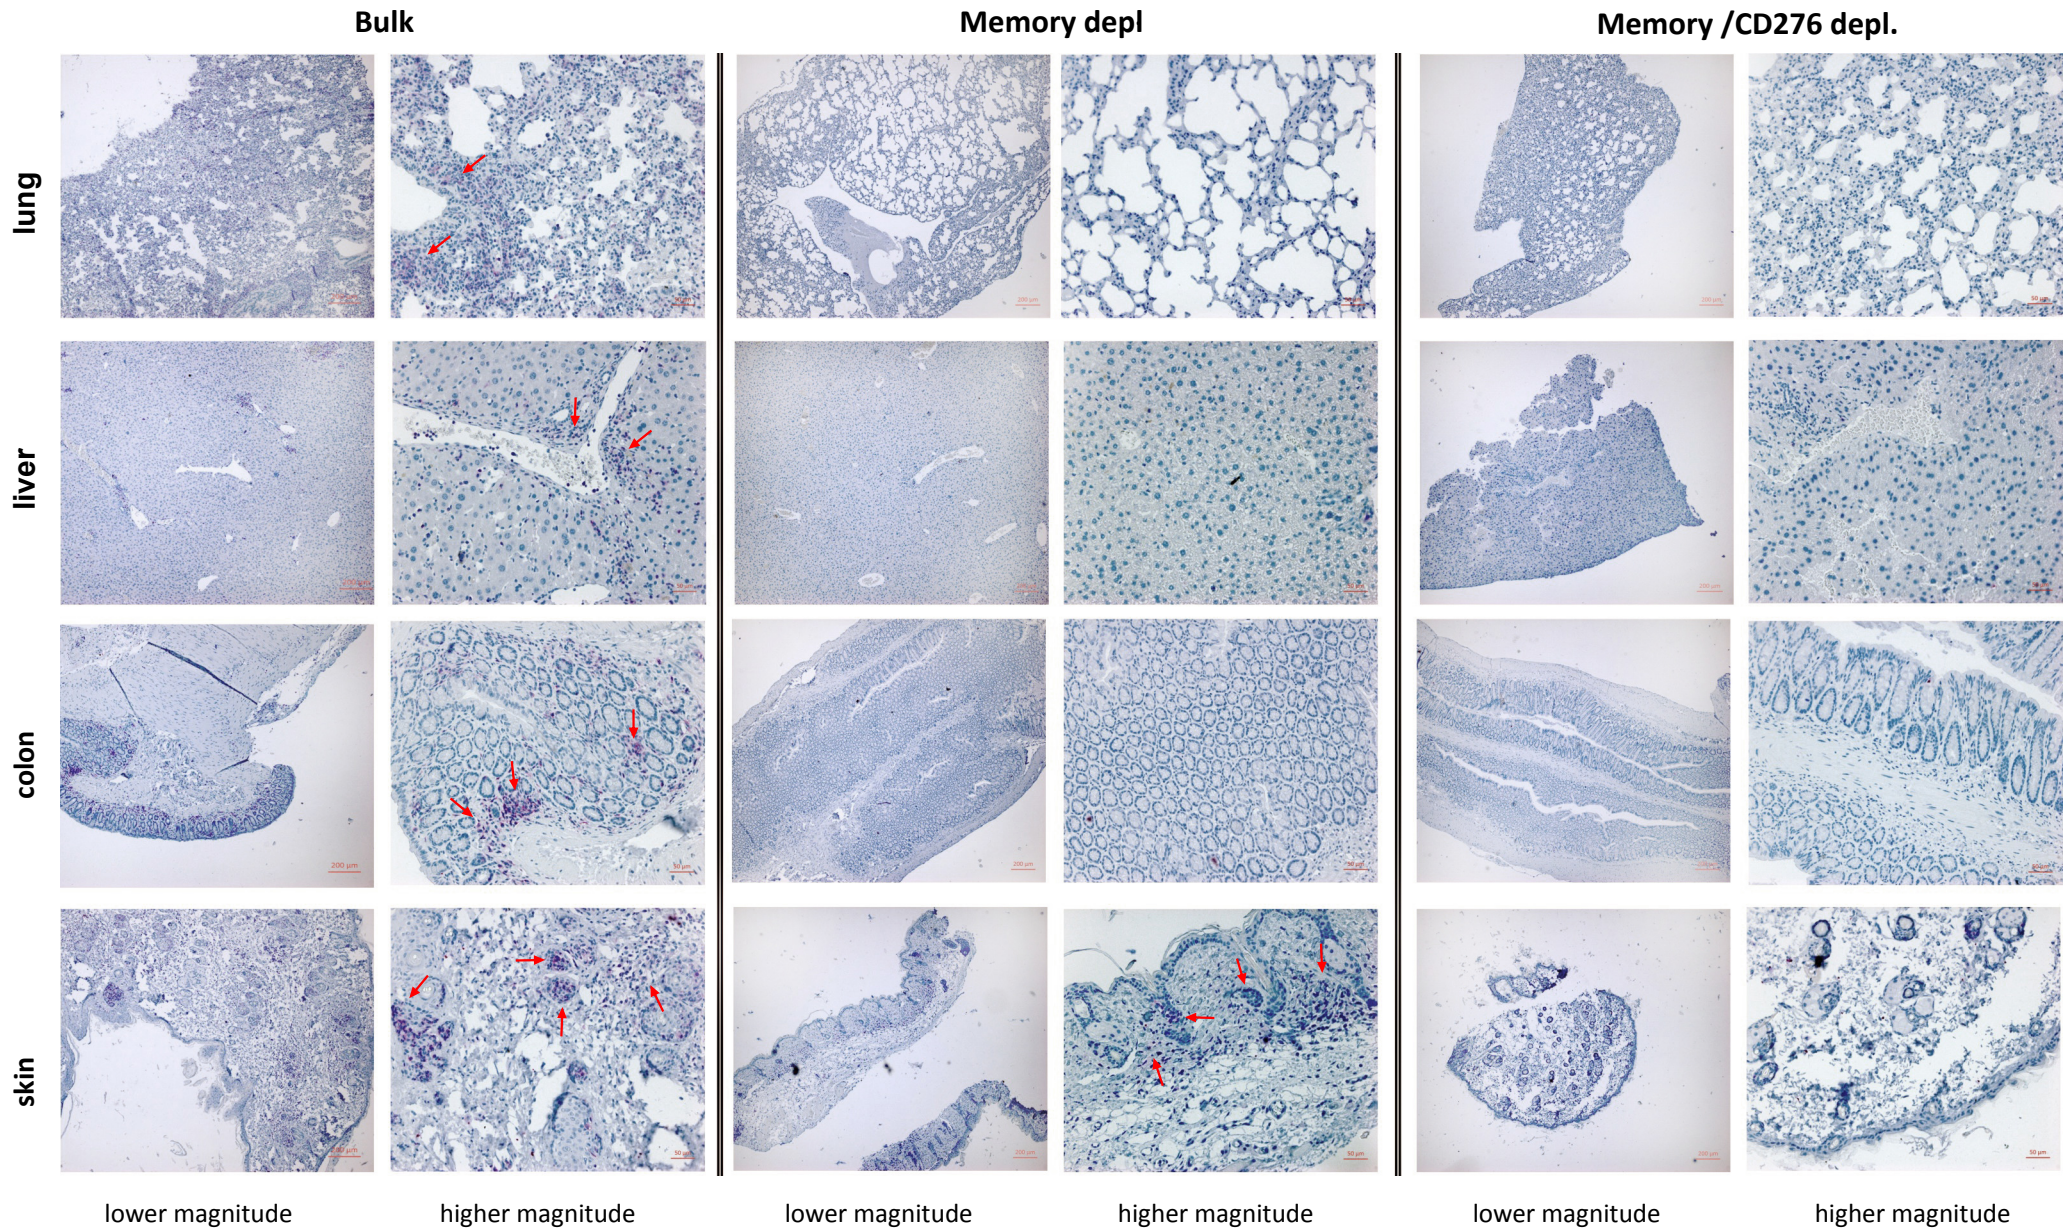

**Supplementary Figure 10:** Histological analysis of GVHD target organs in DR4-matched transplant. Tissues from NSG-Ab<sup>o</sup> DR4 mice were fixed in 10% buffered formalin and embedded in paraffin for hematoxylin and eosin (H&E) staining and immunohistochemical staining with anti-human CD3.

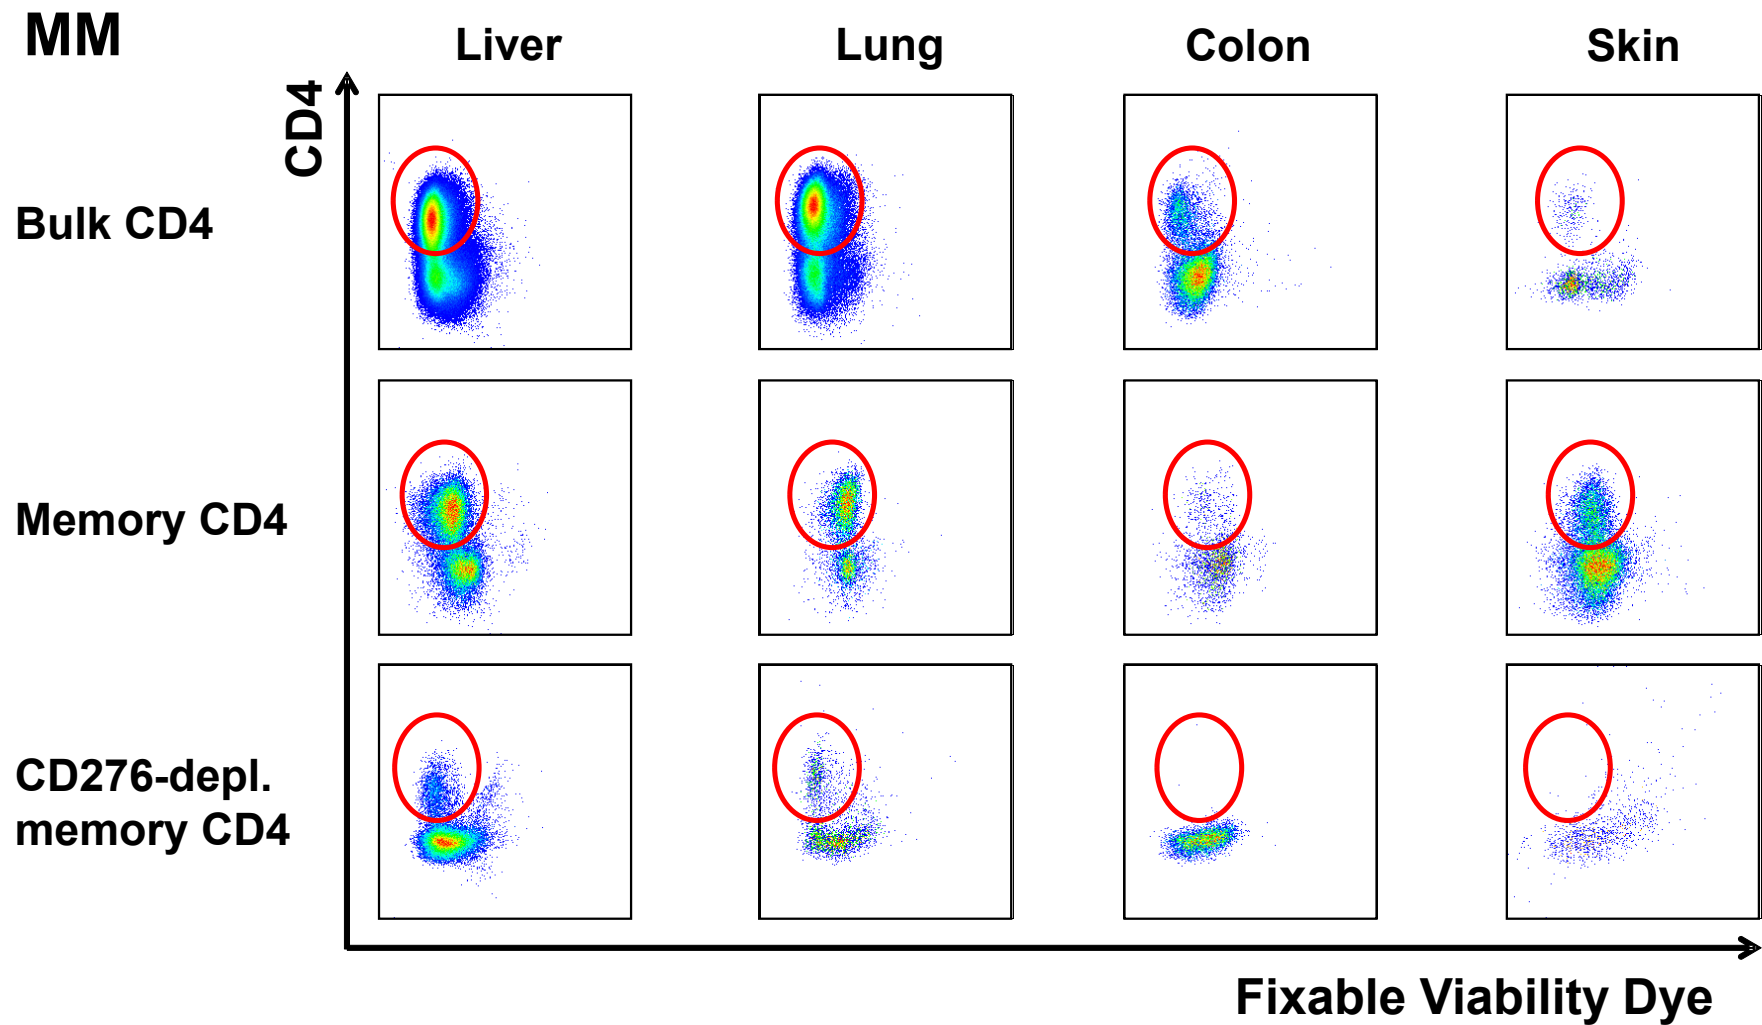

**Supplementary Figure 11:** GVHD target organ infiltrating T cells were analyzed by flow cytometry. Resected tissue specimens were disaggregated into single cell suspensions, and stained for flow cytometric analysis. Representative flow cytometry plots depict target organ infiltrating T cells (CD4<sup>+</sup> Fixable viability<sup>+</sup>) in red circles.

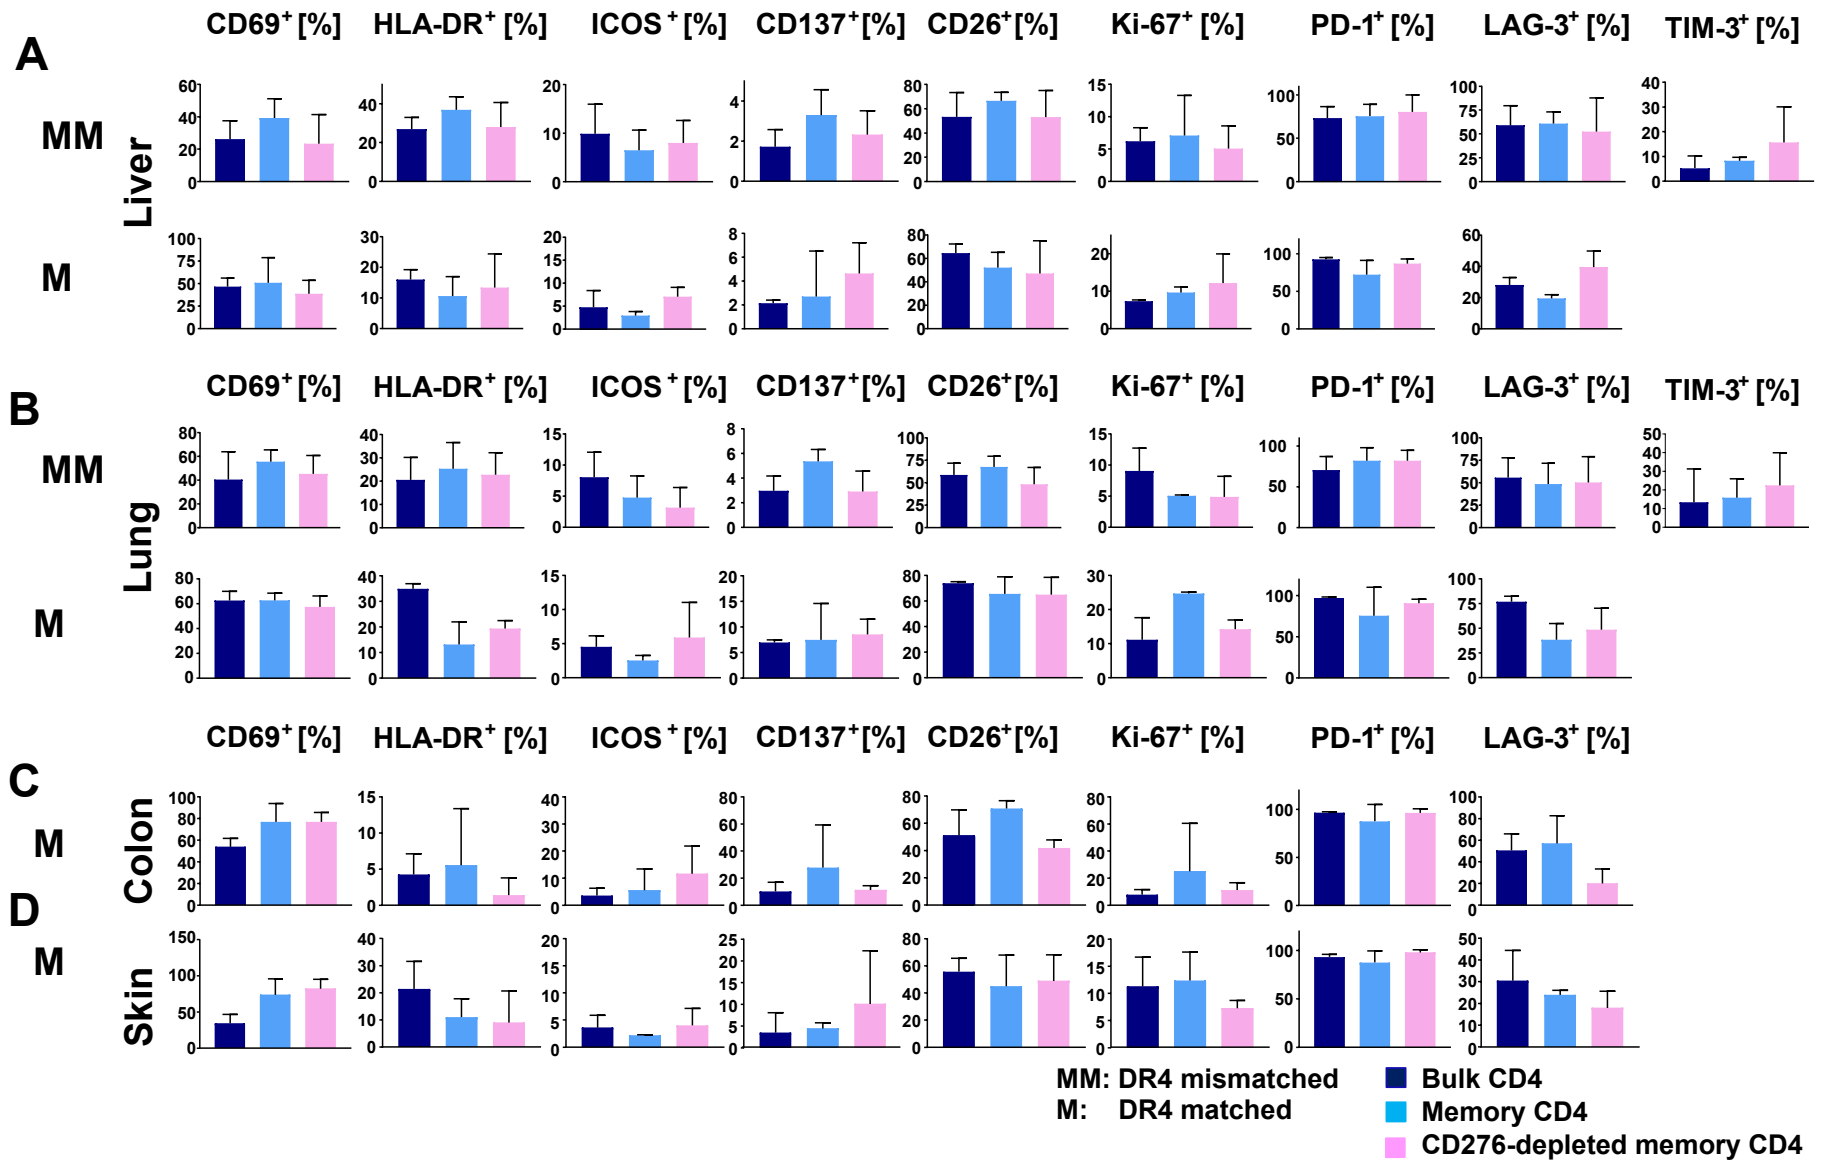

**Supplementary Figure 12:** Activation status of GVHD target organ infiltrating T cells. (A) Liver-infiltrating human CD4<sup>+</sup> T cells, and (B) Lung-infiltrating human CD4<sup>+</sup> T cells from DR4 mice, (C) Colon-infiltrating human CD4<sup>+</sup> T cells, (D) Skin-infiltrating human CD4<sup>+</sup> T cells were analyzed when mice were sacrificed. In DR4-mismatched setting (MM): bulk CD4<sup>+</sup> T cells n=5, memory CD4<sup>+</sup> T cells n=4, CD276-depleted memory CD4<sup>+</sup> T cells n=4. In DR4-matched setting (M): bulk CD4<sup>+</sup> T cells n=5, memory CD4<sup>+</sup> T cells n=3, CD276-depleted memory CD4<sup>+</sup> T cells n=4.

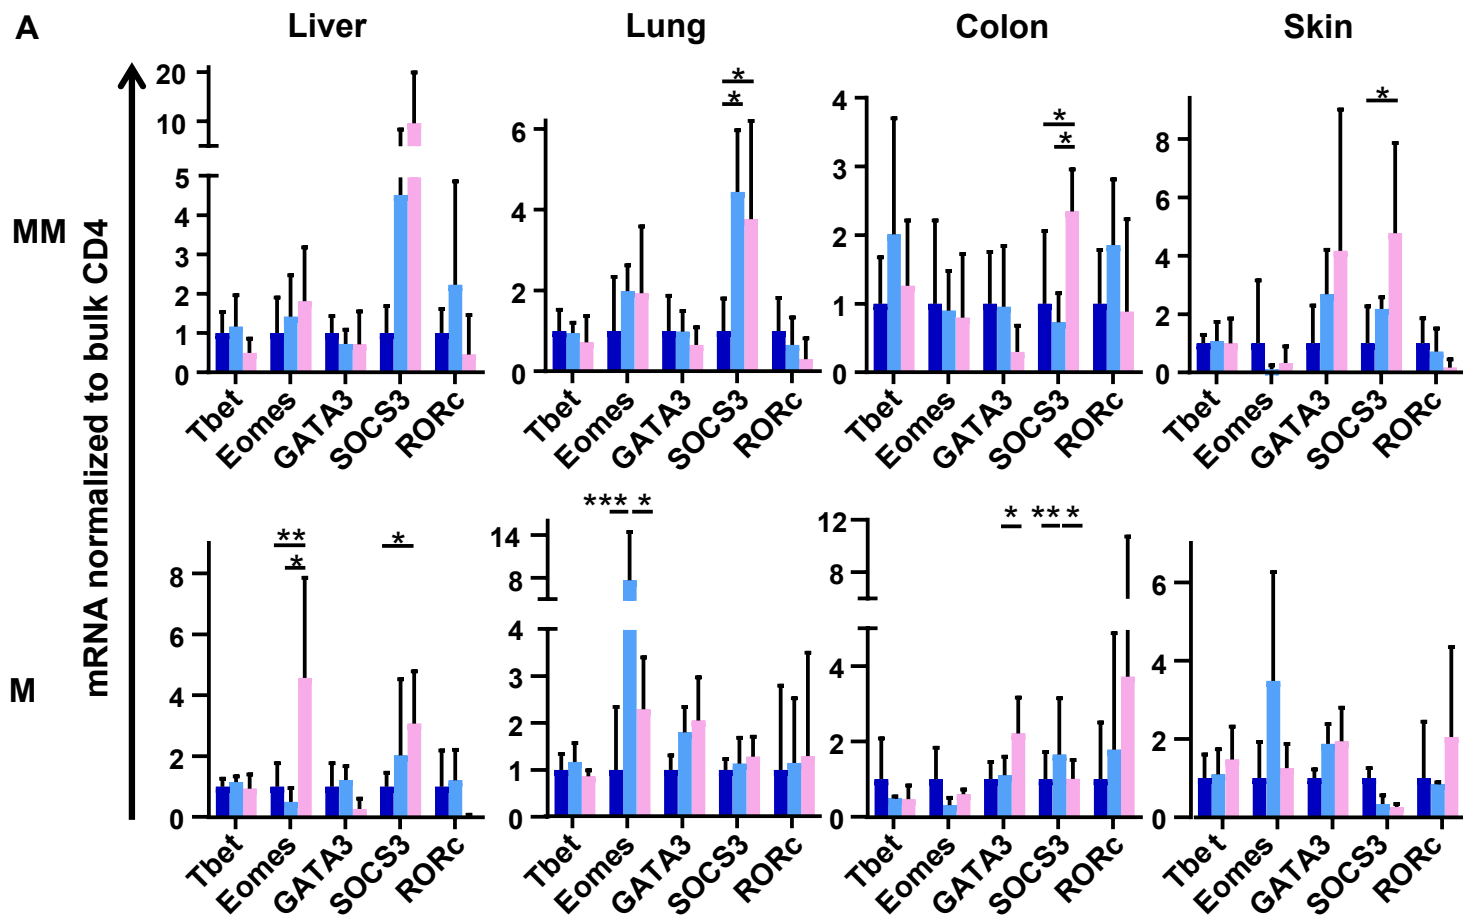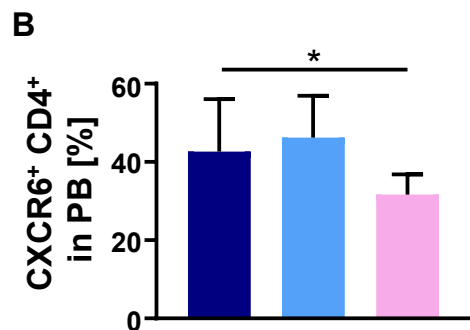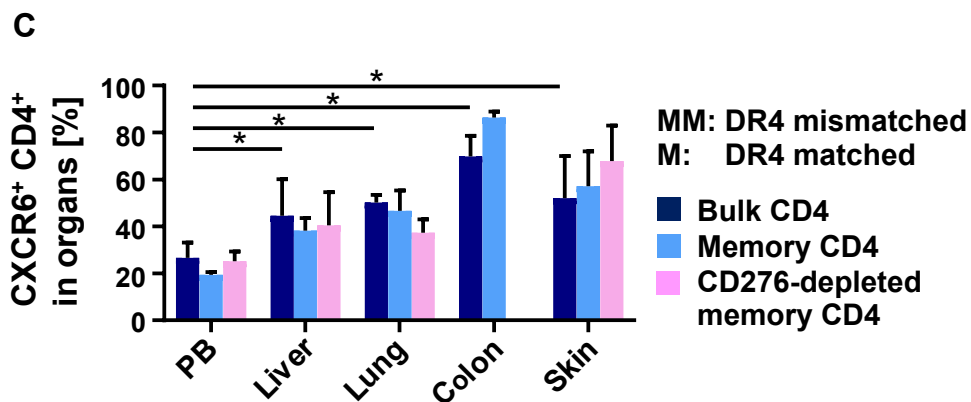

**Supplementary Figure 13: Transcription factors and CXCR6 expression of organ-infiltrating and peripheral T cells.** (A) Transcription factors expressed in target organ infiltrating T cells were analyzed by qPCR when mice were sacrificed. (B) CXCR6 expression on peripheral CD4<sup>+</sup> T cells was examined when DR4 mice had achieved human CD4<sup>+</sup> T cells engraftment. (C) CXCR6 expression of organ-infiltrating CD4<sup>+</sup> T cells was examined when mice were sacrificed. \*P < 0.05, \*\*P < 0.01, \*\*\*P < 0.001 by one-way ANOVA followed by Tukey's multiple comparison test.

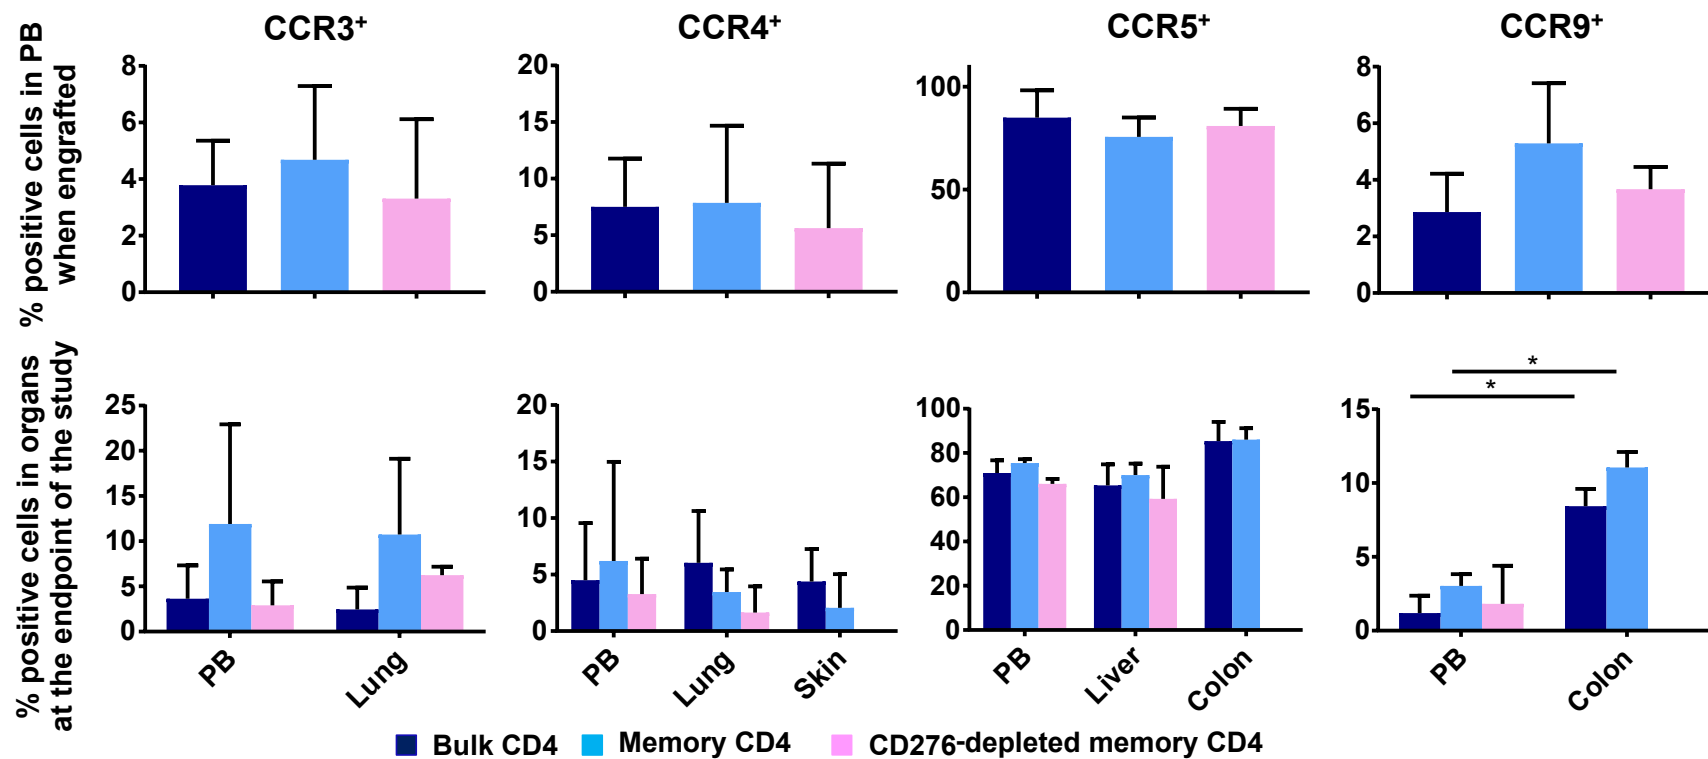

**Supplementary Figure 14:** Chemokine receptor expression of engrafted human cells. Colon-infiltrating T cells show a higher level of CCR9 than peripheral T cells, CCR9 expression on circulating T cells at engraftment was similar in all cohorts. The expression of the chemokine receptors CCR3, CCR4, CCR5 was not upregulated in organs and expression levels on circulating T cells at engraftment and did not differ between cohorts. \*P < 0.05 by one-way ANOVA followed by Tukey's multiple comparison test.

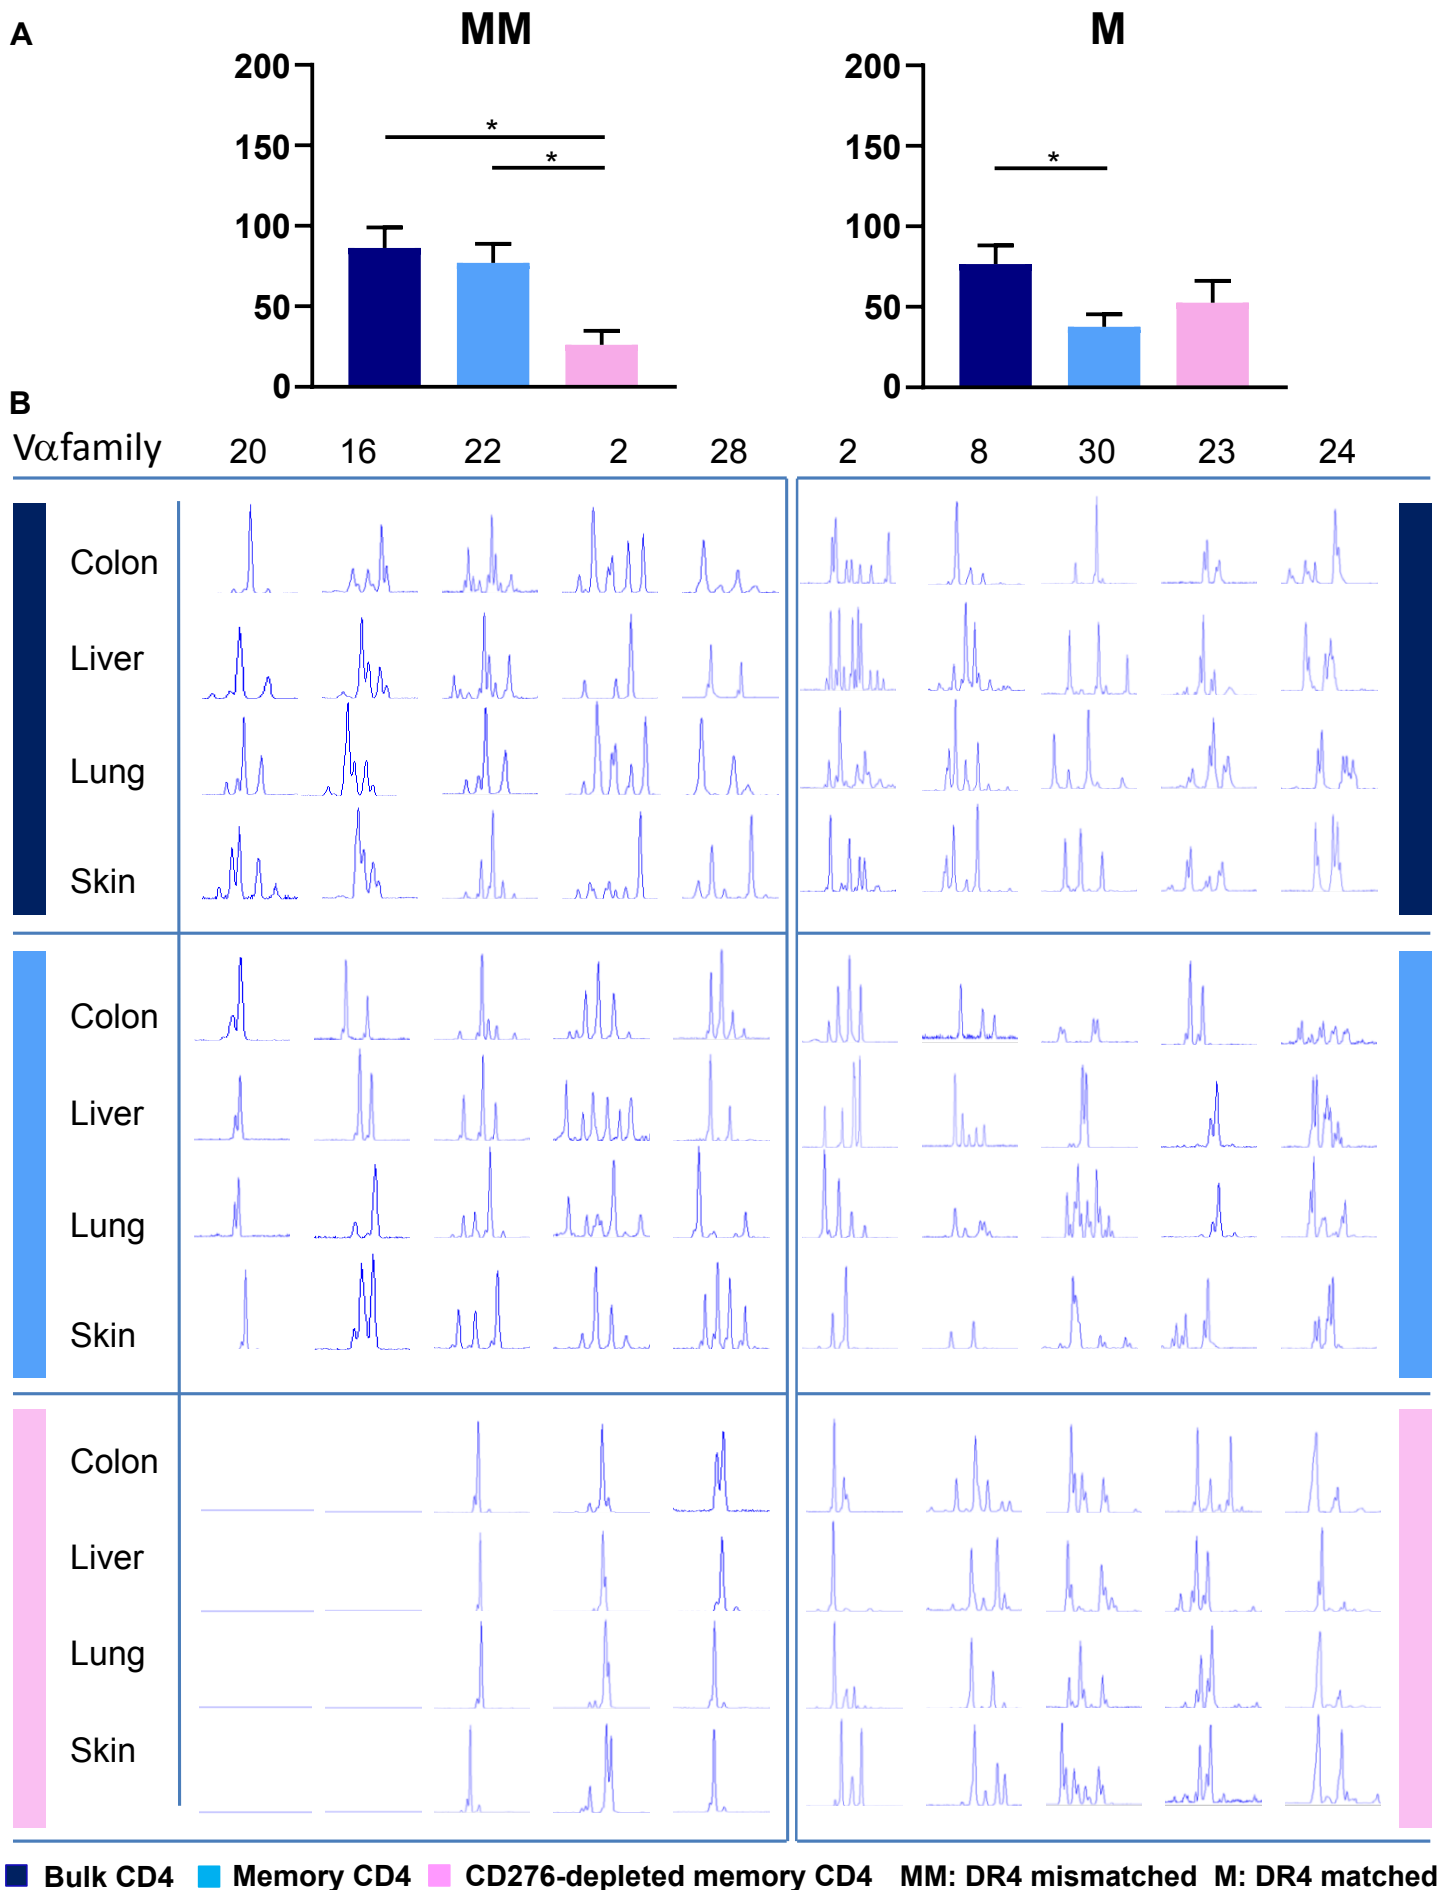

**Supplementary Figure 15: Reduction of complexity scores of TCR Vα chains in GVHD target organ infiltrating T cells by CD45RA/CD276-depletion in DR4-mismatched transplant.** (A) The overall TCR complexity score for 34 Vα gene families was calculated for GVHD target tissues from NSG-Ab<sup>o</sup> DR4 mice. Mean + SD of TCR complexity scores in a single organ per mouse are shown. (B) Representative TCR Vα spectratypes of target organ-infiltrating T cells transplanted with differently engineered grafts with all grafts generated from the same donor. CDR3 length versus fluorescence intensity is presented on the x-axis and the y-axis respectively. \*P < 0.05 by one-way ANOVA followed by Tukey's multiple comparison test.

### Bulk CD4

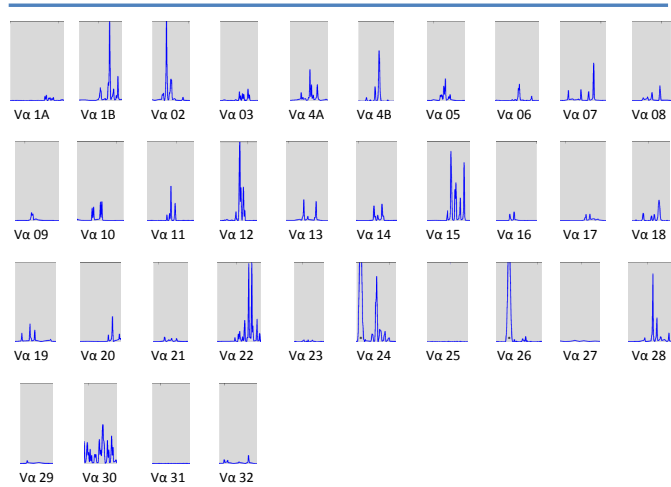

### Memory CD4

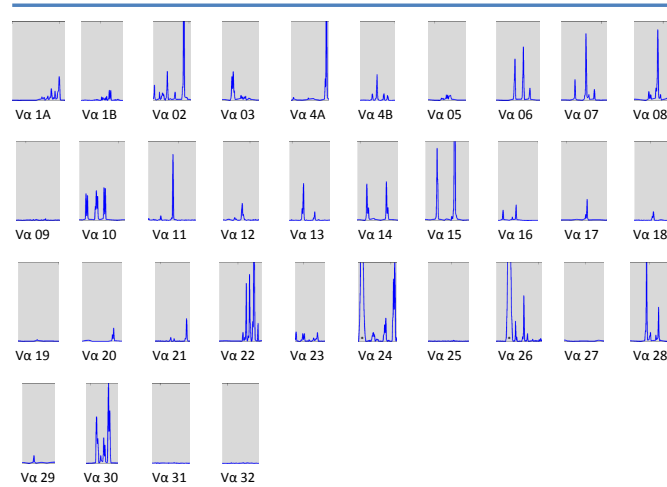

### CD276-depleted memory CD4

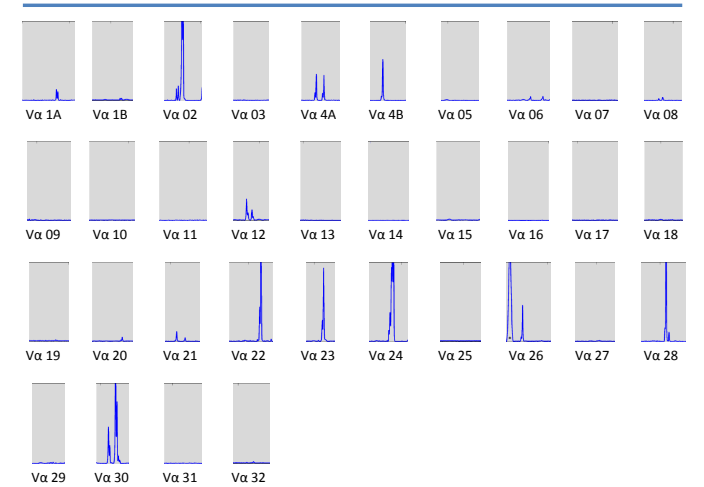

**Supplementary Figure 16:** Vα-chains Gaussian distribution pattern skewed to single peaks indicate CD45RA/CD276-depletion reduces the repertoire diversity of alloreactive T cell pools in DR4-mismatched transplantation. The repertoire of 24 different TCR Vα-chains of GVHD target organ infiltrating T cells was analyzed by TCR spectratyping in all cohorts. Representative data of liver-infiltrating T cells from a DR4<sup>negative</sup> donor are shown.



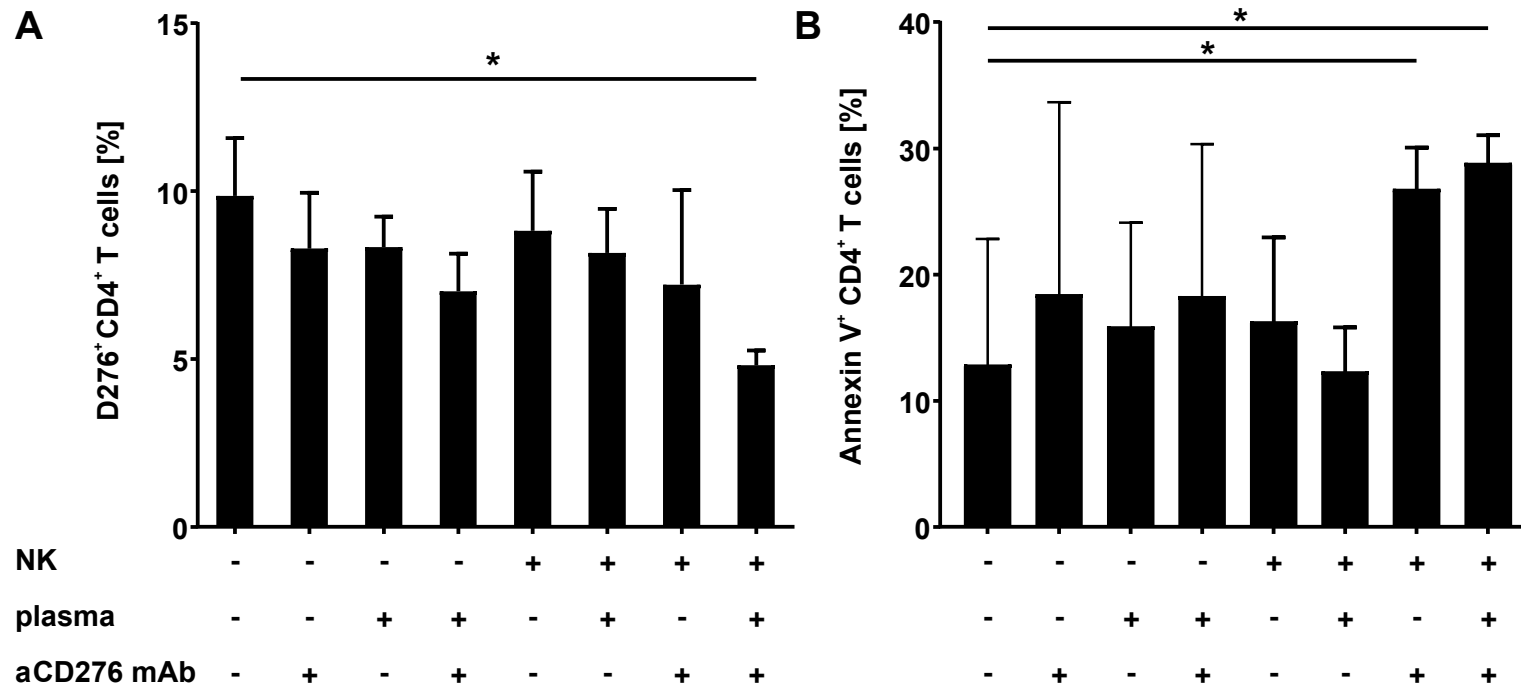

**Supplementary Figure 17:** The anti-CD276 mAb exhibits ADCC activity *in vitro*. CD4<sup>+</sup> T cells were isolated from PBMCs and incubated with anti-CD276 depleting mAb in the presence or absence of autologous NK cells/autologous plasma for 24 hours at 37 °C. Cells were harvested and apoptotic CD4<sup>+</sup> T cells were analyzed by staining Annexin-V and 7-AAD. The frequency of CD276<sup>+</sup> T cells in CD4<sup>+</sup> T cells after 24 hour-incubation is shown on the left and the frequency of Annexin-V<sup>+</sup> apoptotic cells in CD4<sup>+</sup> T cells after 24 hour-incubation is shown on the right (n=3). \*P < 0.05 by one-way ANOVA followed by Tukey's multiple comparison test.

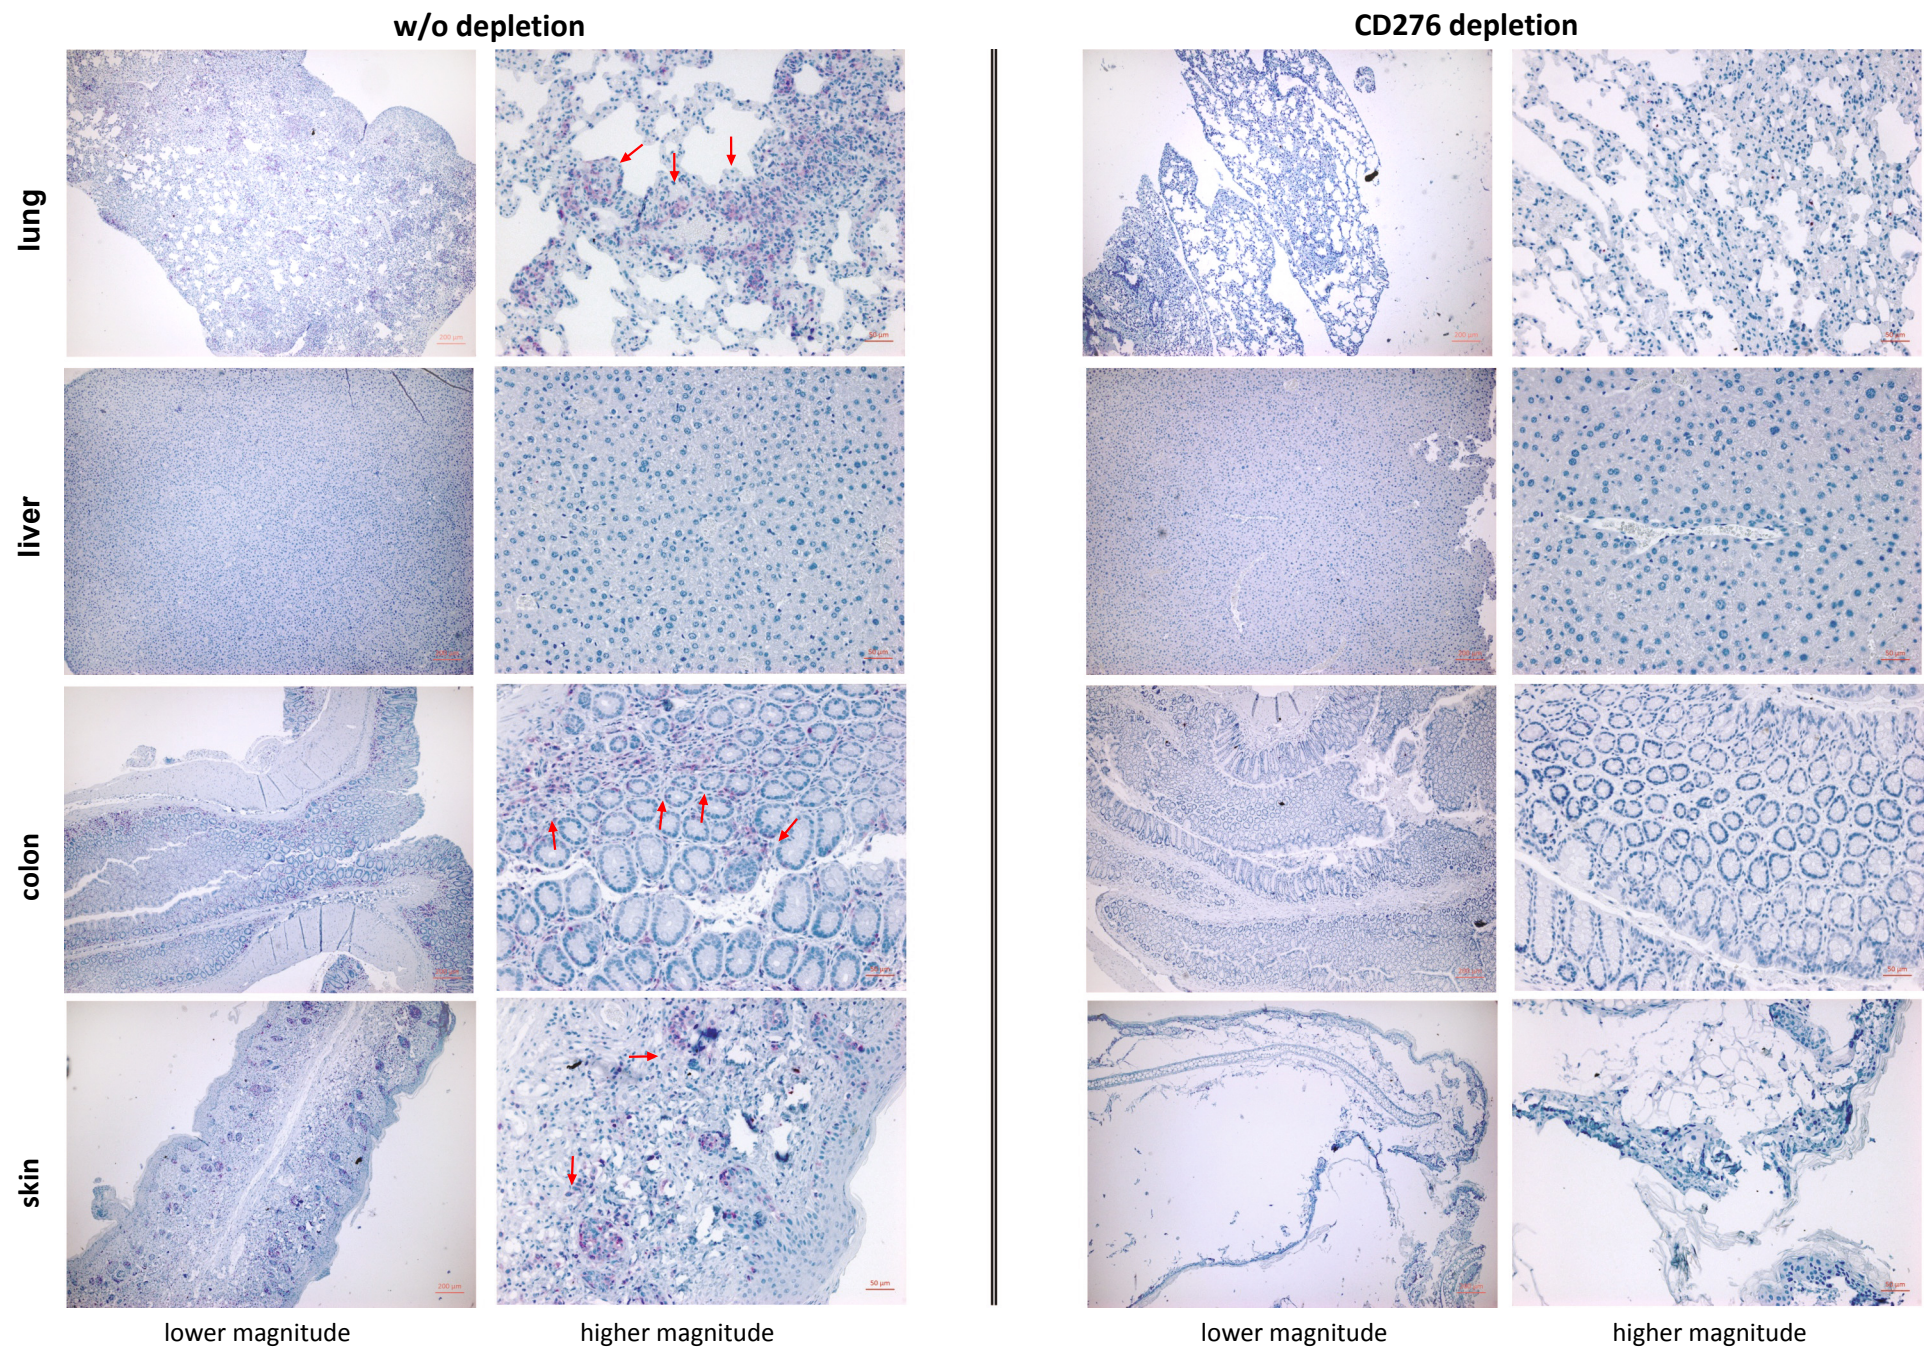

**Supplementary Figure 18:** Histological analysis of GVHD target organs for infiltrating CD3 T cells in controls or after in vivo CD276-depletion. Tissues from NSG-Ab<sup>o</sup> DR4 mice were fixed in 10% buffered formalin and embedded in paraffin for hematoxylin and eosin (H&E) staining and immunohistochemical staining with anti-human CD3.

**Table S1:** The primer sequences for qPCRs used in this study

|       |         |                                  |
|-------|---------|----------------------------------|
| GAPDH | Forward | 5'-CCACATCGCTCAGACACCAT-3'       |
|       | Reverse | 5'-GGCAACAATATCCACTTTACCAGACT-3' |
| T-bet | Forward | 5'-GCCTACCAGAATGCCGAGATTA -3'    |
|       | Reverse | 5'-ACTCAAAGTTCTCCCGGAATCC-3'     |
| RORC  | Forward | 5'-CAGTGAGAGCCCAGAAGGAC-3'       |
|       | Reverse | 5'-TCTTGGCCTTCATTGTACCC -3'      |
| Foxp3 | Forward | 5'-GAGAAGCTGAGTGCCATGCA-3'       |
|       | Reverse | 5'-GGAGCCCTTGTCGGATGAT-3'        |
| Gata3 | Forward | 5'-GCGGGCTCTATCACAAAATGA-3'      |
|       | Reverse | 5'-GCCTTCGCTTGGGCTTAAT-3'        |
| Eomes | Forward | 5'- GGCAAAGCGGACAATAACAT-3'      |
|       | Reverse | 5'-AGCCTCGGTTGGTATTTGTG-3'       |

**Table S2:** Antibodies used for flow cytometry in this study

| specificity | isotype                    | clone     | manufacturer            | catalogue number | fluorescence |
|-------------|----------------------------|-----------|-------------------------|------------------|--------------|
| CD28        | Mouse IgG <sub>1</sub> , κ | CD28.2    | BD Biosciences          | 612815           | BUV737       |
| PD-1        | Mouse IgG <sub>1</sub> , κ | EH12.1    | BD Biosciences          | 612791           | BUV737       |
| HLA-DR      | Mouse IgG2a, κ             | G46-6     | BD Biosciences          | 612981           | BUV661       |
| CD25        | Mouse IgG <sub>1</sub> , κ | M-A251    | BD Biosciences          | 740290           | BUV395       |
| ICOS        | Mouse IgG2b, κ             | 2D3/B7-H2 | BD Biosciences          | 743011           | BUV395       |
| CD161       | Mouse IgG <sub>1</sub> , κ | DX12      | BD Biosciences          | 744096           | BV786        |
| CD276       | Mouse IgG <sub>1</sub> , κ | 7-517     | BD Biosciences          | 565829           | BV421        |
| CCR6        | Mouse IgG <sub>1</sub> , κ | 11A9      | BD Biosciences          | 551773           | PE           |
| CCR4        | Mouse IgG <sub>1</sub> , κ | 1G1       | BD Biosciences          | 551120           | PE           |
| CD45RA      | Mouse IgG <sub>1</sub> , κ | 5H9       | BD Biosciences          | 561216           | PE-Cy7       |
| CCR7        | Mouse IgG <sub>1</sub> , κ | 2-L1-A    | BD Biosciences          | 566769           | PE-CF594     |
| CD26        | Mouse IgG <sub>1</sub> , κ | M-A261    | BD Biosciences          | 565158           | PE-CF594     |
| CD95        | Mouse IgG <sub>1</sub> , κ | DX2       | BD Biosciences          | 556640           | FITC         |
| CD3         | Mouse IgG <sub>1</sub> , κ | UCHT1     | BD Biosciences          | 555332           | FITC         |
| CD45        | Mouse IgG <sub>1</sub> , κ | HI30      | BD Biosciences          | 561864           | APC          |
| CD8         | Mouse IgG <sub>1</sub> , κ | HIT8α     | BD Biosciences          | 566855           | APC-H7       |
| LAG-3       | Mouse IgG <sub>1</sub> , κ | 11C3C65   | BioLegend               | 369314           | BV421        |
| CD3         | Mouse IgG2a, κ             | HIT3α     | BioLegend               | 300324           | Alexa700     |
| IL-17A      | Mouse IgG <sub>1</sub> , κ | BL168     | BioLegend               | 512310           | Alexa647     |
| CD69        | Mouse IgG <sub>1</sub> , κ | FN50      | BioLegend               | 310910           | APC          |
| Ki-67       | Mouse IgG <sub>1</sub> , κ | Ki-67     | BioLegend               | 350526           | PE-Cy7       |
| CXCR6       | Mouse IgG2a, κ             | K041E5    | BioLegend               | 356012           | PE-Cy7       |
| CD8         | Mouse IgG <sub>1</sub> , κ | HIT8α     | BioLegend               | 300922           | PerCP        |
| CD4         | Mouse IgG <sub>1</sub> , κ | SK3       | BioLegend               | 344624           | PerCP        |
| TNF-α       | Mouse IgG <sub>1</sub> , κ | MAb11     | BioLegend               | 502948           | BV785        |
| IFN-γ       | Mouse IgG <sub>1</sub> , κ | B27       | BioLegend               | 506507           | PE           |
| TIM-3       | Mouse IgG <sub>1</sub> , κ | F38-2E2   | ThermoFisher Scientific | 17-3109-42       | APC          |
| CD137       | human IgG1                 | REA765    | Miltenyi Biotec         | 130-110-765      | FITC         |
| CCR3        | human IgG1                 | REA574    | Miltenyi Biotec         | 130-108-890      | APC          |
| CCR5        | human IgG1                 | REA245    | Miltenyi Biotec         | 130-120-057      | APC          |
| CD4         | human IgG1                 | REA623    | Miltenyi Biotec         | 130-114-534      | Vioblue      |
| CCR9        | Mouse IgG2a                | 112509    | R&D                     | MAB179-100       | FITC         |

**Table S3:** TRAV CDR3 sequences of GVHD target infiltrating T cells. TCR epitope-binding region (CDR3) sequences derived from single peaks in TCR V $\alpha$ -repertoire spectratype analysis of GVHD target organ infiltrating T cells were identified in direct sequencing approaches and amino acid sequences were delineated. TCR $\alpha$  binding regions (CDR3 regions) identified in recipients of one of the three different graft types, all grafts generated from the same donor, are shown for a representative HLA-DR4<sup>negative</sup> (MM) and a DR4<sup>positive</sup> (M) donor.

| MM                        |       |      |      |          |                   |                |              |             | M     |      |      |                |                |               |              |             |
|---------------------------|-------|------|------|----------|-------------------|----------------|--------------|-------------|-------|------|------|----------------|----------------|---------------|--------------|-------------|
|                           | Organ | TRAV | TRAJ | Variable | N                 | Joining        | public motif | Reactivity  | Organ | TRAV | TRAJ | Variable       | N              | Joining       | public motif | Reactivity  |
| bulk CD4                  | Liver | 14   | 56   | CA       | MRAP              | GANSKLTFGKG    |              |             | Liver | 26   | 31   | CI             | GRCDNA         | ARLMFGDG      | public       | Influenza A |
|                           | Liver | 26   | 39   | CAL      | VGAISRILTLAWTSKKT | FGKG           |              |             | Liver | 2    | 30   | CAV            | DRDDNPSFLWKRDT | FGYG          |              |             |
|                           | Lung  | 22   | 49   | CA       | GPYSG             | YFGYG          |              |             | Liver | 39   | 13   | CAV            | TN             | GGYQKVTFGIG   | public       | CMV         |
|                           | Lung  | 26   | 39   | CIV      | RVG               | NNAGNMLTFGGG   | public       | Influenza A | Liver | 26   | 47   | CI             | L RDN          | FGFG          |              |             |
|                           | Lung  | 23   | 9    | CAAS     | TLRRDQIVALHOG     | FGAG           |              |             | Liver | 25   | 36   | CA             | germline       | QTGANNLFFGTG  | public       | CMV         |
|                           | Colon | 22   | 49   | CAV      | AA                | NTGNQFYFGTG    | public       | CMV         | Lung  | 22   | 40   | CAL            | S              | TSGTYKIFGTG   |              |             |
|                           | Skin  | 26   | 52   | CA       | RKSHR             | FGKG           |              |             | Lung  | 26   | 31   | CI             | GIDRFT         | FGVG          |              |             |
|                           | Skin  | 22   | 49   | CAV      | AGYSYGIS          | FGTG           |              |             | Lung  | 25   | 36   | CA             | GTGAHT         | LFFGTG        |              |             |
|                           | Skin  | 14   | 56   | CA       | SESAP             | GANSKLTFGKG    |              |             | Lung  | 26   | 56   | CIV            | germline       | TF GIG        |              |             |
|                           | Skin  | 3    | 32   | CAV      | RGVNGE            | KLIFGGG        |              |             | Lung  | 3    | 5    | CAV            | RDSYTDS        | RALTFGSG      |              |             |
| memory CD4                | Liver | 2    | 37   | CAV      | EAG               | NTGKLIFGQG     |              |             | Lung  | 39   | 14   | CIS            | RTPRQQQ        | FGSG          |              |             |
|                           | Liver | 10   | 6    | CAV      | IELGI             | SGGSYIPTFGRG   |              |             | Colon | 26   | 3    | CAS            | germline       | KIIFGSG       |              |             |
|                           | Lung  | 23   | 44   | CA       | PGTNSAGGG         | LTFGTG         |              |             | Skin  | 25   | 9    | PAS            | FSLQKKRGG      | FGAG          |              |             |
|                           | Lung  | 26   | 53   | CI       | LRDPDR            | GGSNYKLTFGKG   |              |             | Skin  | 38   | 52   | CA             | LSG            | FGAG          |              |             |
|                           | Lung  | 2    | 37   | CAV      | EAG               | NTGKLIFGQG     |              |             | Skin  | 2    | 36   | CA             | EGGKT          | FGKG          |              |             |
|                           | Lung  | 29   | 52   | CA       | AGSG              | AGGTSYGKLTFGQG | public       | Insulin     | Skin  | 26   | 2    | CIA            | EL             | GIG           |              |             |
|                           | Colon | 8-3  | 18   | CA       | GTR               | FGQG           |              |             | Skin  | 3    | 15   | CAV            | RLT            | N QAGTALIFGKG | public       | CMV         |
|                           | Colon | 29   | 52   | CA       | ST                | AGGTSYGKLTFGQG |              |             | Liver | 19   | 2    | CAL            | SGDNQGG        | KLTFGLG       |              |             |
|                           | Colon | 13-1 | 20   | CA       | ASVG              | SNDYKLSFGAG    | public       | CMV         | Liver | 2    | 18   | CAV            | GSGSAQ         | GSG           |              |             |
|                           | Skin  | 29   | 18   | CAV      | QFKI              | FGQG           |              |             | Liver | 25   | 53   |                | CRVGVVGG       | FGEG          |              |             |
| Skin                      | 2     | 37   | CAV  | EAG      | NTGKLIFGQG        |                |              | Lung        | 9-2   | 12   | CI   | RGLSVCVMGSKGL  | IFGSG          |               |              |             |
| CD276-depleted memory CD4 | Liver | 12   | 25   | CAV      | RGEYTPCDCTR       | FGRG           |              |             | Skin  | 3    | 8    | CAV            | RDMG           | TGFQKLVFGTG   |              |             |
|                           | Liver | 20   | 37   | CAV      | WRGTTQA           | KLIFGQG        |              |             | Skin  | 25   | 40   | CA             | AI             | TSGTYKIFGTG   | public       | Influenza A |
|                           | Liver | 1    | 32   | CAV      | SGRR              | GATNKLIFGTG    | public       | CMV         | Skin  | 2    | 20   | CAL            | FIAAHP         | FGAG          |              |             |
|                           | Lung  | 25   | 54   | CAS      | L                 | IQAQKLVFGQG    |              |             | Skin  | 24   | 20   | CAF            | LCPLLWDDYK     | FGAG          |              |             |
|                           | Lung  | 26-1 | 23   | CI       | VRS               | NQGGKLIFGQG    |              |             | Skin  | 5    | 29   | CA             | EGH            | SGNTPLVFGKG   |              |             |
|                           | Lung  | 9-2  | 6    | CI       | DLNDT             | GGSYIPTFGRG    |              |             | Liver | 8-4  | 20   | CA             | SPLRCRTRVDHE   | FGAG          |              |             |
|                           | Colon | 3    | 5    | CAV      | RDGNTGRRAL        | TFGSG          |              |             | Liver | 5    | 7    | CAV            | CDKLI          | FGEG          |              |             |
|                           | Colon | 26-1 | 42   | CI       | VCPLLEATVISP      | FGKG           |              |             | Lung  | 30   | 14   | CA             | FSLEY          | FGGG          |              |             |
|                           | Skin  | 3    | 5    | CAV      | RDGNTGRRAL        | TFGSG          |              |             | Lung  | 9-2  | 12   | CI             | RGLSVCVMGSKGL  | IFGSG         |              |             |
|                           | Skin  | 38   | 43   | CAV      | LIGAL             | MRFGAG         |              |             | Colon | 23   | 11   | CA             | TKRFSSAPQL     | FGKG          |              |             |
| Skin                      | 9-2   | 6    | CA   | LSET     | GGSYIPTFGRG       | public         | CMV          | Skin        | 24    | 3    | CA   | P              | YSSASKIIFGKG   | public        | EBV          |             |
| Skin                      | 8-4   | 33   | CAV  | SDRII    | YQLIWGAG          | public         | CMV          | Skin        | 26    | 42   | CIV  | CHTR           | GSQGNLIFGKG    |               |              |             |
|                           |       |      |      |          |                   |                |              | Skin        | 26    | 53   | CAV  | VHSSISQGSTVQDQ | GTG            |               |              |             |
|                           |       |      |      |          |                   |                |              | Skin        | 8-3   | 6    | CAV  | GAR            | GSYIPTFGRG     | public        | CMV          |             |
|                           |       |      |      |          |                   |                |              | Skin        | 8-4   | 15   | CAV  | RAF            | NQAGTALIFGKG   |               |              |             |
